# Supplementary material for: An extensive theoretical study on the thermochemistry of aromatic compounds: from electronic structure to group additivity values
Source: Royal Society of Chemistry journal article supplement (doi:10.1039/d2cp01459a), 2022-01-01
Supplement: d2cp01459a1.xlsx [file d2cp01459a1.xlsx]

## Sheet: Species-Non-oxygenated-species
Species	H298[kcal/mol]	S298[cal/mol/K]	Cp300	Cp400	Cp500	Cp600	Cp800	Cp1000	Cp1500	RA[cal/mol/K]	symmetry number	radical isomer	Species	H298[kcal/mol]	S298[cal/mol/K]	Cp300	Cp400	Cp500	Cp600	Cp800	Cp1000	Cp1500													this work - THERM
1.C6H6	20.1345	69.1873	19.5922	26.549	32.7795	37.954	45.0494	50.126	57.4961	4.93751	12		CB/H	3.3	11.53	3.24	4.44	5.46	6.3	7.54	8.41	9.73		CB/H,	3.3	11.53	3.24	4.44	5.46	6.3	7.54	8.41	9.73		0	0	0	0	0	0	0	0	0
2.C7H8	11.8566	80.0895	24.7333	32.9133	40.3335	46.6094	55.5204	61.973	71.4789	3.56023	6		C/CB/H3	-10.1534	30.1295	5.86332	7.57325	9.35349	10.9594	12.8604	14.483	16.8489		C/CB/H3,	-10.01	30.29	6.22	7.74	9.24	10.62	12.84	14.59	17.35		-0.143393	-0.160548	-0.356683	-0.166747	0.113487	0.33939	0.02036	-0.106951	-0.50112
3.C8H10	6.89465	89.8103	30.3331	39.8891	48.6329	56.0531	66.591	74.286	85.6863	3.56023	6		C/CB/C/H2	-5.10535	9.56029	5.24313	6.80913	8.41287	9.78311	11.091	12.206	13.7063		C/C/CB/H2,	-4.86	9.34	5.84	7.61	8.98	10.01	11.49	12.54	13.76		-0.245346	0.220293	-0.596867	-0.800867	-0.567127	-0.226893	-0.399014	-0.334045	-0.053737
4.C9H12	0.293847	98.8138	36.3462	47.4216	57.3957	65.8217	77.8957	86.7374	99.9605	5.74317	18		C/C2/CB/H	-1.69615	-11.7262	5.03625	6.60165	7.93572	8.93173	9.55573	10.0674	10.6305		C/C2/CB/H,	-0.98	-12.15	4.88	6.66	7.9	8.75	9.73	10.25	10.68		-0.716153	0.423831	0.156246	-0.05835	0.035725	0.181728	-0.174266	-0.182577	-0.049462
5.C8H8	35.4098	83.3487	28.3216	37.395	45.4149	52.0563	61.254	67.8142	77.3773	1.37728	2		CD/CB/H	7.26976	6.26865	3.20159	4.76502	6.21489	7.38631	8.31396	9.03415	9.94732		CD/CB/H,	6.78	6.38	4.46	5.79	6.75	7.42	8.35	9.11	10.09		0.489758	-0.111349	-1.25841	-1.02498	-0.53511	-0.03369	-0.03604	-0.075846	-0.142679
6.C9H10	27.7673	93.6829	34.0934	44.316	53.3464	60.9052	71.7345	79.58	91.2479	3.56023	6		CD/C/CB	10.0673	-17.3271	4.28342	6.01595	7.40637	8.43517	9.1345	9.64998	10.1879		CD/C/CB,	8.64	-14.6	4.4	5.37	5.93	6.18	6.5	6.62	6.72		1.42735	-2.72714	-0.116581	0.64595	1.47637	2.25517	2.6345	3.02998	3.46785
7.C8H6	76.0514	79.6744	27.4926	35.4743	42.2375	47.7227	55.3388	60.7499	68.6646	1.37728	2		CT/CB	26.9314	5.12437	2.42261	3.31426	4.06752	4.63266	4.8888	5.12988	5.41464		CT/CB,	24.67	6.43	2.57	3.54	3.5	4.92	5.34	5.5	5.8		2.26143	-1.30563	-0.147388	-0.225739	0.56752	-0.287336	-0.451204	-0.370119	-0.385362
8.C9H10	32.0699	94.3357	33.63	43.8979	53.0884	60.7977	71.7058	79.6039	91.2813	1.37728	2		C/CB/CD/H2	-5.08006	12.6357	3.87995	5.06787	6.29836	7.40766	8.30583	9.15387	10.2113		C/CB/CD/H2,	-4.29	2	4.51	6.76	8.61	10.01	11.97	13.4	15.47		-0.790064	10.6357	-0.630047	-1.69213	-2.31164	-2.60234	-3.66417	-4.24613	-5.2587
9.C10H12	25.751	102.834	39.9417	51.342	61.7031	70.4898	83.0369	92.1318	105.627	3.56023	6	1.37728	C/C/CB/CD/H	-1.38897	-9.1561	3.97169	4.772	5.67309	6.47983	6.79686	7.09178	7.20725		C/C/CB/CD/H,	-1.56	-11.77	4.5	6.57	8.07	8.89	9.88	10.39	10.79		0.171031	2.6139	-0.528309	-1.798	-2.39691	-2.41017	-3.08314	-3.29822	-3.58275
10.C9H8	72.9242	90.4368	31.9409	41.2963	49.4762	56.2442	65.7548	72.5922	82.6403	1.37728	2		C/CB/CT/H2	-3.56577	9.42681	4.66093	6.48625	8.19619	9.63423	11.0248	12.2222	12.8103		C/CB/CT/H2,	-4.29	9.84	4.28	6.43	8.16	9.5	11.36	12.74	13.7		0.724225	-0.413186	0.38093	0.056254	0.03619	0.134227	-0.335164	-0.517846	-0.889712
11.C10H10	66.106	99.1429	38.7209	49.426	58.7121	66.3927	77.3295	85.2276	96.9934	3.56023	6	1.37728	C/C/CB/CT/H	-0.373981	-12.1571	5.22091	6.87602	8.19206	9.1627	9.75954	10.2676	9.8134		C/C/CB/CT/H,	-1.55	-11.65	4.33	6.27	7.58	8.48	9.52	10.1	10.63		1.17602	-0.507103	0.890912	0.606021	0.612064	0.682699	0.239541	0.167575	-0.8166
12.C11H12	51.4949	111.059	44.746	56.5166	66.9207	75.662	88.3189	97.4855	111.206	1.37728	2		C/CB/CD2/H	-0.795105	-2.38134	4.11597	4.19657	4.32067	4.53202	4.17894	4.07553	3.69556		C/CB/CD2/H,	-1.39	-11.39	4.12	6.51	8.24	9	10.03	10.53	10.89		0.594895	9.00866	-0.00403	-2.31343	-3.91933	-4.46798	-5.85106	-6.45447	-7.19444
13.C11H10	92.0936	103.704	41.5089	52.9737	62.8307	70.9079	82.2294	90.3998	102.5	1.37728	2	1.37728	C/CB/CD/CT/H	0.463561	-9.0459	3.34888	4.67369	5.7407	6.55791	6.75938	7.06976	6.23004
14.C11H8	136.371	100.686	39.1748	49.8154	58.7407	65.9507	76.0156	83.2017	93.7754	1.37728	2		C/CB/CT2/H	5.40129	-11.3744	3.48482	5.53543	7.16073	8.38073	9.21559	9.9517	8.74542
15.C10H10	50.5178	96.9014	38.6899	49.5741	59.0274	66.8156	77.7428	85.5931	97.2108	1.37728	2		CD/CB/CD	9.40779	-14.0886	3.85985	4.63414	5.35741	5.98555	6.17284	6.43309	6.6108		CD/CB/CD,	7.18	-16.5	4.7	6.13	6.87	7.1	7.2	7.16	7.06		2.22779	2.41145	-0.840145	-1.49586	-1.51259	-1.11445	-1.02716	-0.726908	-0.449201
16.C10H8	92.0816	93.9893	35.6606	45.9285	54.6125	61.641	71.3881	78.3138	88.4527	1.37728	2		CD/CB/CT	8.81162	-14.2207	2.6906	3.76852	5.42254	5.18098	5.6381	6.07381	6.37272		CD/CB/CT,	6.7	-17.04	2.22	3.14	4.54	4.11	5.06	5.79	6.71		2.11162	2.81926	0.470603	0.628525	0.88254	1.07098	0.578098	0.283809	-0.337275
17.C12H10	42.1491	96.8776	39.3301	52.472	63.9894	73.4617	86.4603	95.6006	108.692	4.13185	8		CB/CB	4.57456	-9.2112	3.46505	4.036	4.69468	5.23087	5.53015	5.75031	5.69617		CB/CB,	4.96	-8.64	3.33	4.22	4.89	5.27	5.76	5.95	6.05		-0.385436	-0.571196	0.135053	-0.184002	-0.195317	-0.039125	-0.22985	-0.199693	-0.353834
													CB/H	3.35575	11.5312	3.26536	4.42483	5.46324	6.32567	7.50823	8.35433	9.58268												CB/H	0.0557487	0.00121259	0.0253648	-0.0151738	0.00324483	0.0256738	-0.0317712	-0.055667	-0.147323
GAVs from THERM database
Species	H298[kcal/mol]	S298[cal/mol/K]	Cp300	Cp400	Cp500	Cp600	Cp800	Cp1000	Cp1500
C/C/H3	-10.01	30.29	6.22	7.74	9.24	10.62	12.84	14.59	17.35
CB/H	3.3	11.53	3.24	4.44	5.46	6.3	7.54	8.41	9.73
CB/C	5.51	-7.69	2.67	3.14	3.68	4.15	4.96	5.44	5.98
CD/H2	5.95	27.23	5.33	6.46	7.52	8.45	9.96	11.12	13.03
CB/CD	5.69	-7.8	3.59	3.97	4.38	4.72	5.28	5.61	5.75
CB/CT	5.69	-7.8	3.59	3.97	4.38	4.72	5.28	5.61	5.75
CD/C2	11.98	-18.21	5.33	7.35	8.92	10.04	11.56	12.52	13.76
CD/C/H	9.19	4.51	5.55	7.03	8.29	9.29	10.78	11.84	13.41
CT/H	26.93	24.7	5.28	5.99	6.49	6.87	7.47	7.96	8.85
CT/C	27.55	6.35	3.13	3.48	3.81	4.09	4.6	4.92	6.35
CT/CD	28.2	6.43	2.57	3.54	3.5	4.92	5.34	5.5	5.8
CD/CD/CB	8	-16.5	4.7	6.13	6.87	7.1	7.2	7.16	7.06
CD/C/H	9.19	4.51	5.55	7.03	8.29	9.29	10.78	11.84	13.41
C/CD/H3,	-10.44	33.93	4.69	5.67	6.74	7.8	9.66	11.15	13.63
CD/H2,	5.95	27.23	5.33	6.46	7.52	8.45	9.96	11.12	13.03
CD/CD/H,	7.02	6.68	4.38	5.85	6.95	7.71	8.67	9.26	10.14
Species	H298[kcal/mol]	S298[cal/mol/K]	Cp300	Cp400	Cp500	Cp600	Cp800	Cp1000	Cp1500
1.C6H6	20.1345	64.2498	19.5922	26.549	32.7795	37.954	45.0494	50.126	57.4961
2.C7H8	11.8566	76.5292	24.7333	32.9133	40.3335	46.6094	55.5204	61.973	71.4789
3.C8H10	6.89465	86.2501	30.3331	39.8891	48.6329	56.0531	66.591	74.286	85.6863
4.C9H12	0.293847	93.0707	36.3462	47.4216	57.3957	65.8217	77.8957	86.7374	99.9605
5.C8H8	35.4098	81.9714	28.3216	37.395	45.4149	52.0563	61.254	67.8142	77.3773
6.C9H10	27.7673	90.1226	34.0934	44.316	53.3464	60.9052	71.7345	79.58	91.2479
7.C8H6	76.0514	78.2971	27.4926	35.4743	42.2375	47.7227	55.3388	60.7499	68.6646
8.C9H10	32.0699	92.9584	33.63	43.8979	53.0884	60.7977	71.7058	79.6039	91.2813
9.C10H12	25.751	100.651	39.9417	51.342	61.7031	70.4898	83.0369	92.1318	105.627
10.C9H8	72.9242	89.0595	31.9409	41.2963	49.4762	56.2442	65.7548	72.5922	82.6403
11.C10H10	66.106	96.96	38.7209	49.426	58.7121	66.3927	77.3295	85.2276	96.9934
12.C11H12	51.4949	109.681	44.746	56.5166	66.9207	75.662	88.3189	97.4855	111.206
13.C11H10	92.0936	103.704	41.5089	52.9737	62.8307	70.9079	82.2294	90.3998	102.5
14.C11H8	136.371	99.3083	39.1748	49.8154	58.7407	65.9507	76.0156	83.2017	93.7754
15.C10H10	50.5178	95.5242	38.6899	49.5741	59.0274	66.8156	77.7428	85.5931	97.2108
16.C10H8	92.0816	92.612	35.6606	45.9285	54.6125	61.641	71.3881	78.3138	88.4527
17.C12H10	42.1491	92.7458	39.3301	52.472	63.9894	73.4617	86.4603	95.6006	108.692

## Sheet: Species-oxygenated-species
Species	H298[kcal/mol]	S298[cal/mol/K]	Cp300	Cp400	Cp500	Cp600	Cp800	Cp1000	Cp1500	RA[cal/mol/K]	symmetry number	radical isomer	Species	H298[kxal/mol]	S298[cal/mol/K]	Cp300	Cp400	Cp500	Cp600	Cp800	Cp1000	Cp1500													this work - THERM
39.C9H12O2	-24.1193	110.722	47.565	59.51	69.7086	78.0558	89.8407	98.2643	110.802	5.74317	18	1.37728	O/CB/H	-37.5358	29.1163	4.70021	4.69416	4.97246	5.43475	5.82701	6.33624	6.70457		O/CB/H,	-37.9	29.1	4.3	4.5	4.82	5.23	6.02	6.61	7.44		0.364202	0.0162804	0.400209	0.194164	0.152456	0.204747	-0.192988	-0.273762	-0.73543
38.C8H10O2	-15.3565	103.186	40.7014	50.7161	59.6247	67.076	77.6162	85.1272	96.1788	3.56023	6	2.75457	O/CB/O	0.578161	11.037	2.60308	2.22081	2.32623	2.61626	3.02738	3.39196	3.25802		O/CB/O,	-1.98	10.7	2.85	2.92	3.02	3.09	3.48	3.66	3.23		2.55816	0.336959	-0.246924	-0.699185	-0.693769	-0.473741	-0.452619	-0.268045	0.028024
37.C7H8O2	-5.54965	95.6579	33.1808	42.0201	49.8441	56.3756	65.6067	72.1359	81.6369	1.37728	2	1.37728	O/CB/C	-22.7291	8.19001	3.12815	2.80277	2.8828	3.20692	3.28711	3.5423	3.30328		O/C/CB,	-22.6	9.7	3.4	3.7	3.7	3.8	4.4	4.6			-0.12913	-1.50999	-0.271854	-0.897226	-0.817204	-0.593077	-1.11289	-1.0577
36.C9H8O	7.66869	95.6162	35.7514	45.5033	54.0774	61.2086	71.2782	78.3425	88.4002	1.37728	2		O/CB/CD	-25.7327	59.6055	7.36209	8.36175	9.96735	11.8448	14.3968	16.616	19.5409
35.C10H10O	7.28884	105.319	42.7225	53.5184	62.9454	70.7837	81.9785	90.051	101.984	1.37728	2	1.37728	O/CB/CT	-17.9223	9.99638	2.4288	2.1907	2.35947	2.26379	2.83593	3.31551	#VALUE!
34.C10H8O	48.4274	101.994	40.6775	50.814	59.3762	66.3425	76.1733	83.1587	93.4075	1.37728	2	1.37728	O/CB/CO	-36.7768	7.05582	2.50442	2.88677	3.37246	3.79358	3.82392	3.85274	3.17938
33.C9H10O	-19.1884	101.088	39.0434	49.2755	58.1554	65.6019	76.5937	84.5157	96.3125	3.56023	6	1.37728	CO/CB/H	-32.64	33.1989	7.22545	8.29987	9.39947	10.4947	11.8408	12.6624	#VALUE!
32.C8H8O	-12.1457	94.1063	30.6079	39.8103	48.0953	55.0545	64.8398	71.8253	81.926	1.37728	2		CO/CB/O	-36.3889	13.7182	6.92294	7.60723	8.44675	9.43143	10.501	11.2172	#VALUE!		CO/CB/O,	-36.6	14.78	5.97	6.7	7.4	8.02	8.87	9.36			0.21114	-1.06184	0.952944	0.907234	1.04675	1.41143	1.631	1.85718
31.C8H8O2	-51.8891	95.4119	36.3964	47.1923	56.5739	64.1064	73.7389	80.0291	88.6056	1.37728	2	1.37728	CO/CB/C	-33.3481	13.0245	6.68495	7.49181	8.27619	9.23617	9.99729	10.3451	#VALUE!
30.C9H12O	-41.4539	104.524	41.5925	53.1385	63.2727	71.6843	83.5624	92.1366	105.001	5.74317	18		CO/CB/CD	-32.1772	11.1963	1.82787	2.4203	3.01535	3.6245	3.93985	4.02528	#VALUE!
29.C8H10O	-32.5549	95.8652	36.8766	46.4756	54.8658	61.8894	72.1215	79.4844	90.6076	3.56023	6	1.37728
28.C7H8O	-22.717	87.7396	29.5639	37.8848	45.2739	51.471	60.3342	66.6961	76.1637	1.37728	2		C/CB/O/H2	-6.627	7.68963	6.19387	7.94476	9.40394	10.471	11.2142	11.9561	12.2537
27.C9H8O	5.91277	94.6558	35.2808	45.5558	54.4381	61.7031	71.6963	78.6292	88.4742	1.37728	2		C/CB/C/H/O	-6.4549	-14.4748	7.2866	8.79561	9.75577	10.2694	10.1615	10.1544	9.3476		C/CB/C/H/O,	-6	-11.1	4.47	6.82	8.45	9.17	10.24	10.8	11.02		-0.454903	-3.37481	2.8166	1.97561	1.30577	1.09943	-0.078479	-0.645581	-1.6724
26.C8H8O	-20.2181	91.4945	32.2849	41.3918	49.4762	56.2562	65.9173	72.7451	82.571	3.56023	6		C/CB/C2/O	-5.34393	-36.1065	5.78249	7.71853	8.92267	9.44433	8.76244	8.21656	6.39133		C/CB/C2/O,	-6.6	-32.56	4.63	6.79	7.95	8.4	8.8	8.44			1.25607	-3.54646	1.15249	0.928527	0.972665	1.04433	-0.037558	-0.223437
25.C7H6O2	-71.0489	85.8882	29.8529	38.4772	45.9667	52.1614	60.941	67.1572	75.5736	1.37728	2		C/CB/CO/O/H	-6.45908	-19.0881	6.30641	9.54231	11.9339	13.2064	13.1689	12.6591	24.6956
24.C7H60	-9.20004	80.8689	26.3554	34.1699	41.1195	46.9247	55.0808	60.8024	68.8223	1.37728	2		C/CB/CO/H2	-4.81568	9.69632	5.01787	6.7603	8.34535	9.5045	10.7298	11.7053	27.296
23.C7H6O2	-53.3368	89.4358	29.4444	38.0568	45.6825	51.9536	60.3939	66.1227	73.8894	1.37728	2		C/CB/CO/H/C	-1.84845	-13.6125	7.23343	8.48551	9.16543	9.43194	9.64373	9.80565	24.3325
22.C8H6O	56.0077	87.0564	31.4488	40.0707	47.1995	52.8638	60.5659	65.9555	73.7699	1.37728	2		C/CB/CO/CD/H	-0.521161	-10.8309	6.25249	6.97838	7.38537	7.49368	7.12853	6.97097	20.914
21.C8H8O	4.41726	92.4555	31.8621	41.2318	49.3974	56.1248	65.4968	72.186	81.9809	1.37728	2		C/CB/CO/CT/H	1.27742	-13.4664	6.6775	8.29403	9.32621	9.83253	9.99327	10.1587	23.5775
20.C7H8O	-17.1291	86.05	29.4181	38.1428	45.7828	52.0969	60.9171	67.2623	76.6033	3.56023	6		CD/CO/CB	10.4287	-14.8638	3.18138	4.10328	5.0574	5.83857	6.1982	6.66248	#VALUE!
19.C6H6O2	-0.121839	86.317	27.9131	35.4408	41.9962	47.3763	54.7774	59.952	67.408	1.37728	2	1.37728	C/OO/CB/H2	-6.95965	7.05795	4.79082	5.63012	7.3041	8.19562	9.54672	10.5959	#VALUE!		C/CB/H2/OO	-6.41	4.68	4.31	5.66	7.64	8.62	10.38	11.4			-0.549647	2.37795	0.480821	-0.029879	-0.335904	-0.424378	-0.833282	-0.804145
18.C6H6O	-21.9358	76.5663	24.8002	32.1942	38.4725	43.5347	50.427	55.2862	62.4246	1.37728	2		C/OO/CB/C/H	-6.75649	-15.7037	6.09139	6.58608	7.84466	8.27595	8.71622	8.99724	#VALUE!
													C/OO/CB/C2	-5.50934	-38.4582	6.73499	7.63999	8.68863	8.6358	8.10073	7.54435	#VALUE!
GAVs from THERM database
CB/O	-0.9	-10.2	3.9	5.3	6.2	6.6	6.9	6.9	7.07
O/H/O	-16.3	27.83	5.21	5.72	6.17	6.66	7.15	7.61	8.43
O/C/H	-38.1	30.09	4.5	4.6	4.89	5.35	6.46	7.25	9.28
CB/H	3.3	11.53	3.24	4.44	5.46	6.3	7.54	8.41	9.73
C/H3/O	-10	30.41	6.19	7.84	9.4	10.79	13.03	14.77	17.58
CD/H/O	8.6	8	4.2	5	5.8	6.5	7.6	8.4	9.6
CD/C/O	6.9	-14.6	4.4	5.37	5.93	6.18	6.5	6.62	6.72
CT/O	31.4	4.91	3.64	4.39	4.85	5.63	5.66	5.73	none
CO/H/O	-32.16	34.93	6.84	7.67	8.81	10.06	11.97	13.32	14.99
CB/CO,	6.94	-9.98	2.93	3.67	4.42	4.93	5.54	6.09	none
O/CO/H	-58.1	24.5	3.8	5	5.8	6.3	7.2	7.8	none
C/CO/H3	-10.31	30.8	6.47	8.03	9.48	10.59	12.68	14.26	none
CD/CO/H	8.7	8.01	4.32	5.06	5.84	6.55	7.7	8.54	10.09
CB/C	5.51	-7.69	2.67	3.14	3.68	4.15	4.96	5.44	5.98
C/C/H3	-10.01	30.29	6.22	7.74	9.24	10.62	12.84	14.59	17.35
CO/C/O	-34.86	15.14	5.52	6.04	6.8	7.64	8.91	9.99	11.54
CO/C/H	-29.34	34.45	6.72	7.71	8.77	9.9	11.45	12.63
CD/C/H	9.19	4.51	5.55	7.03	8.29	9.29	10.78	11.84	13.41
CT/C	27.55	6.35	3.13	3.48	3.81	4.09	4.6	4.92	6.35
CD/H2,	5.95	27.23	5.33	6.46	7.52	8.45	9.96	11.12	13.03
CT/H,	26.93	24.7	5.28	5.99	6.49	6.87	7.47	7.96	8.85
CB/CD,	5.69	-7.8	3.59	3.97	4.38	4.72	5.28	5.61	5.75
CO/CD/H,	-30.9	33.4	7.45	8.77	9.82	10.7	12.14	12.9	none
OO/C/H	-20.6	38.64	9.52	11.05	11.56	12.53	13.4	14.05	none
C/C/H2/O	-8.02	9.15	4.55	6.6	8.3	9.53	10.91	11.95	12.67
O/C2,	-23.84	8.81	3.21	2.96	2.97	3.09	3.55	3.86	4.24
C/C2/H2,	-5	9.65	5.59	7.08	8.43	9.53	11.23	12.48	14.34
C/C/CB/H2,	-4.86	9.34	5.84	7.61	8.98	10.01	11.49	12.54	13.76
CD/CB/H,	6.78	6.38	4.46	5.79	6.75	7.42	8.35	9.11	10.09
C/C/CD/H2,	-5.48	13.26	3.98	5	5.94	6.73	8.03	8.98	10.56
C/CB/CD/H2,	-4.29	2	4.51	6.76	8.61	10.01	11.97	13.4	15.47
CD/C/H,	9.19	4.51	5.55	7.03	8.29	9.29	10.78	11.84	13.41
C/CD/H2/O,	-6.76	9.8	5.12	6.86	8.32	9.49	11.22	12.48	14.4
Species	H298[kcal/mol]	S298[cal/mol/K]	Cp300	Cp400	Cp500	Cp600	Cp800	Cp1000	Cp1500
39.C9H12O2	-24.1193	106.356	47.565	59.51	69.7086	78.0558	89.8407	98.2643	110.802
38.C8H10O2	-15.3565	102.381	40.7014	50.7161	59.6247	67.076	77.6162	85.1272	96.1788
37.C7H8O2	-5.54965	95.6579	33.1808	42.0201	49.8441	56.3756	65.6067	72.1359	81.6369
36.C9H8O	7.66869	94.2389	35.7514	45.5033	54.0774	61.2086	71.2782	78.3425	88.4002
35.C10H10O	7.28884	105.319	42.7225	53.5184	62.9454	70.7837	81.9785	90.051	101.984
34.C10H8O	48.4274	101.994	40.6775	50.814	59.3762	66.3425	76.1733	83.1587	93.4075
33.C9H10O	-19.1884	98.9046	39.0434	49.2755	58.1554	65.6019	76.5937	84.5157	96.3125
32.C8H8O	-12.1457	92.729	30.6079	39.8103	48.0953	55.0545	64.8398	71.8253	81.926
31.C8H8O2	-51.8891	95.4119	36.3964	47.1923	56.5739	64.1064	73.7389	80.0291	88.6056
30.C9H12O	-41.4539	98.7804	41.5925	53.1385	63.2727	71.6843	83.5624	92.1366	105.001
29.C8H10O	-32.5549	93.6822	36.8766	46.4756	54.8658	61.8894	72.1215	79.4844	90.6076
28.C7H8O	-22.717	86.3624	29.5639	37.8848	45.2739	51.471	60.3342	66.6961	76.1637
27.C9H8O	5.91277	93.2785	35.2808	45.5558	54.4381	61.7031	71.6963	78.6292	88.4742
26.C8H8O	-20.2181	87.9343	32.2849	41.3918	49.4762	56.2562	65.9173	72.7451	82.571
25.C7H6O2	-71.0489	84.5109	29.8529	38.4772	45.9667	52.1614	60.941	67.1572	75.5736
24.C7H60	-9.20004	79.4916	26.3554	34.1699	41.1195	46.9247	55.0808	60.8024	68.8223
23.C7H6O2	-53.3368	88.0585	29.4444	38.0568	45.6825	51.9536	60.3939	66.1227	73.8894
22.C8H6O	56.0077	85.6791	31.4488	40.0707	47.1995	52.8638	60.5659	65.9555	73.7699
21.C8H8O	4.41726	91.0782	31.8621	41.2318	49.3974	56.1248	65.4968	72.186	81.9809
20.C7H8O	-17.1291	82.4898	29.4181	38.1428	45.7828	52.0969	60.9171	67.2623	76.6033
19.C6H6O2	-0.121839	86.317	27.9131	35.4408	41.9962	47.3763	54.7774	59.952	67.408
18.C6H6O	-21.9358	75.189	24.8002	32.1942	38.4725	43.5347	50.427	55.2862	62.4246

## Sheet: Radicals
Species	H298[kcal/mol]	S298[cal/mol/K]	Cp300	Cp400	Cp500	Cp600	Cp800	Cp1000	Cp1500	RA[cal/mol/K]	symmetry number	radical isomer				radical	H298[kcal/mol]	S298[cal/mol/K]	Cp300	Cp400	Cp500	Cp600	Cp800	Cp1000	Cp1500												this work - THERM
40.C10H11	52.9617	101.631	38.752	50.4413	60.7069	69.2356	81.2666	89.8097	102.146	3.56023	6					40.C10H11	79.3107	-1.20284	-1.18972	-0.900653	-0.996213	-1.25423	-1.77025	-2.32211	-3.48077	DSUALLYLT,	73.16	-6.25	-2.27	-2.02	-1.94	-1.95	-2.13	-2.4	-2.98
41.C10H7O	71.6413	100.428	38.6684	49.0079	57.7469	64.804	74.4866	81.1543	90.438	1.37728	2					41.C10H7O	75.3139	-1.56596	-2.00915	-1.80608	-1.6293	-1.53852	-1.68663	-2.00437	-2.96953
42.C10H9	92.944	99.4045	38.0162	48.2076	57.0493	64.3812	74.8736	82.356	93.2307	3.56023	6					42.C10H9	78.938	0.26162	-0.704755	-1.21839	-1.66274	-2.01154	-2.45589	-2.87158	-3.76267
43.C10H9O	33.3624	103.368	41.1386	52.0706	61.6434	69.5748	80.7004	88.4479	99.2892	1.37728	2					43.C10H9O	78.1735	-1.95059	-1.58391	-1.44773	-1.30201	-1.20883	-1.27811	-1.60302	-2.69479
44.C11H11	72.7522	104.211	44.402	56.8773	67.6517	76.405	88.2401	96.5634	108.516	2.75457	4					44.C11H11	73.3573	-6.84804	-0.344016	0.360739	0.731034	0.742979	-0.078837	-0.922154	-2.69001	TSUALLYLT,	71.19	-6.09	-3.09	-2.72	-2.69	-2.83	-3.39	-4.03	-5.19
45.C11H7	154.939	99.4231	39.9608	50.1379	58.4564	65.0955	74.4102	80.9393	90.3424	2.75457	4					45.C11H7	70.6673	-1.26256	0.785981	0.322515	-0.284291	-0.855262	-1.60541	-2.26238	-3.43299
46.C11H9	112.211	101.097	41.3393	53.0095	62.7543	70.5567	81.2332	88.6964	99.3513	1.37728	2					46.C11H9	72.2178	-2.60757	-0.169619	0.035835	-0.076448	-0.351183	-0.996213	-1.70336	-3.1487
47.C7H7	50.1786	78.4715	25.8108	33.8402	40.7778	46.4661	54.388	60.0427	68.2418	2.75457	4					47.C7H7	90.4219	-1.61792	1.07744	0.926932	0.444354	-0.14334	-1.13239	-1.93031	-3.2371	BENZYLP,	89	-3.36	0.75	0.6	0.13	-0.42	-1.41	-2.18	-3.37		1.42195	1.74208	0.327439	0.326932	0.314354	0.27666	0.277614	0.249688	0.132905
48.C7H7O	8.79869	85.537	30.0441	38.2957	45.3862	51.1676	59.1373	64.7753	73.0078	1.37728	2					48.C7H7O	83.6157	-2.20266	0.480189	0.410908	0.112283	-0.303403	-1.19689	-1.92076	-3.15587	C*CCJOH	86.15	-4.35	-0.48	-0.04	-0.04	-0.38	-1.35	-2.15	-3.18
49.C8H7O	19.3294	89.3665	31.5682	40.6512	48.5349	55.0211	64.0634	70.4062	79.3459	1.37728	2					49.C8H7O	83.5751	-4.73978	0.960378	0.840928	0.439576	-0.033446	-0.776425	-1.41907	-2.58012
50.C8H7O2	-31.9027	93.9893	34.4995	44.1798	52.6703	59.7465	69.8233	76.9186	86.8473	1.37728	2					50.C8H7O2	72.0864	-1.42262	-1.89687	-3.01253	-3.90363	-4.35992	-3.91557	-3.11048	-1.7583
51.C8H9	42.7416	89.1223	30.1301	39.397	47.7274	54.7344	64.6463	71.7918	82.1649	3.56023	6					51.C8H9	87.9469	-0.688032	-0.203065	-0.492134	-0.905431	-1.31873	-1.94465	-2.49412	-3.52139	BENZYLS,	86.5	-3.67	0.87	0.09	-0.62	-1.21	-2.07	-2.69	-3.65		1.44694	2.98197	-1.07306	-0.582134	-0.285431	-0.108728	0.125354	0.195884	0.128614
52.C8H9O	-0.745368	97.4193	34.2105	43.8573	52.3549	59.4144	69.3359	76.4361	86.8593	3.56023	6					52.C8H9O	83.9095	1.55407	-2.66612	-2.61834	-2.51084	-2.475	-2.78557	-3.04836	-3.74834
53.C9H11	35.6033	100.569	34.9869	45.4221	54.9852	63.1413	74.8665	83.3833	95.8777	7.12045	36					53.C9H11	87.4094	1.75475	-1.35934	-1.99959	-2.4105	-2.68046	-3.02925	-3.35416	-4.0828	BENZYLT,	84.2	-3.96	0.26	-0.78	-1.54	-2.06	-2.73	-3.19	-3.91		3.20942	5.71475	-1.61934	-1.21959	-0.870501	-0.620458	-0.299252	-0.164156	-0.172801
54.C9H7	100.754	88.6451	32.4402	41.5949	49.3185	55.5753	64.2928	70.4516	79.31	1.37728	2					54.C9H7	79.9295	-1.79175	0.499301	0.298625	-0.157674	-0.66892	-1.46207	-2.14054	-3.33027
55.C9H9	58.7766	90.045	33.8641	44.5501	53.8719	61.4666	71.67	78.8083	88.8397	1.37728	2					55.C9H9	78.8066	-4.29064	0.234122	0.652197	0.783592	0.66892	-0.035835	-0.795537	-2.44156	DSUALLYLS,	74.7	-5.44	-1.05	-0.71	-0.67	-0.81	-1.29	-1.78	-2.69
56.C9H9O	11.4099	100.95	36.3701	46.5759	55.647	62.5225	74.145	81.8448	92.9249	3.56023	6					56.C9H9O	82.6983	-0.137343	-2.67329	-2.69957	-2.50845	-3.07942	-2.44873	-2.6709	-3.3876
57.C6H5	81.5079	70.2784	19.0881	25.4691	31.1119	35.7657	42.1133	46.5974	53.0167	1.37728	2					57.C6H5	113.473	1.09116	-0.504079	-1.07983	-1.66752	-2.18832	-2.93608	-3.52855	-4.47938	PH1,	113	1.48	-0.41	-1.18	-1.93	-2.69	-3.75	-4.48	-5.24		0.47341	-0.388843	-0.094079	0.100172	0.262478	0.501676	0.813919	0.951447	0.760625
58.C6H5O	13.8108	75.5868	22.9893	29.9366	35.9329	40.8208	47.4957	52.1447	58.767	1.37728	2					58.C6H5O	87.8466	-0.97949	-1.81086	-2.25761	-2.53951	-2.7139	-2.9313	-3.14153	-3.65756	PHENOXY,	86.5	1.3	-1.58	-2.24	-2.67	-2.93	-3.21	-3.41	-3.81		1.34661	-2.27949	-0.230862	-0.017605	0.130493	0.216096	0.278697	0.268465	0.152441
40.C10H11	25.751	102.834	39.9417	51.342	61.7031	70.4898	83.0369	92.1318	105.627
41.C10H7O	48.4274	101.994	40.6775	50.814	59.3762	66.3425	76.1733	83.1587	93.4075
42.C10H9	66.106	99.1429	38.7209	49.426	58.7121	66.3927	77.3295	85.2276	96.9934
43.C10H9O	7.28884	105.319	42.7225	53.5184	62.9454	70.7837	81.9785	90.051	101.984
44.C11H11	51.4949	111.059	44.746	56.5166	66.9207	75.662	88.3189	97.4855	111.206
45.C11H7	136.371	100.686	39.1748	49.8154	58.7407	65.9507	76.0156	83.2017	93.7754
46.C11H9	92.0936	103.704	41.5089	52.9737	62.8307	70.9079	82.2294	90.3998	102.5
47.C7H7	11.8566	80.0895	24.7333	32.9133	40.3335	46.6094	55.5204	61.973	71.4789
48.C7H7O	-22.717	87.7396	29.5639	37.8848	45.2739	51.471	60.3342	66.6961	76.1637
49.C8H7O	-12.1457	94.1063	30.6079	39.8103	48.0953	55.0545	64.8398	71.8253	81.926
50.C8H7O2	-51.8891	95.4119	36.3964	47.1923	56.5739	64.1064	73.7389	80.0291	88.6056
51.C8H9	6.89465	89.8103	30.3331	39.8891	48.6329	56.0531	66.591	74.286	85.6863
52.C8H9O	-32.5549	95.8652	36.8766	46.4756	54.8658	61.8894	72.1215	79.4844	90.6076
53.C9H11	0.293847	98.8138	36.3462	47.4216	57.3957	65.8217	77.8957	86.7374	99.9605
54.C9H7	72.9242	90.4368	31.9409	41.2963	49.4762	56.2442	65.7548	72.5922	82.6403
55.C9H9	32.0699	94.3357	33.63	43.8979	53.0884	60.7977	71.7058	79.6039	91.2813
56.C9H9O	-19.1884	101.088	39.0434	49.2755	58.1554	65.6019	76.5937	84.5157	96.3125
57.C6H5	20.1345	69.1873	19.5922	26.549	32.7795	37.954	45.0494	50.126	57.4961
58.C6H5O	-21.9358	76.5663	24.8002	32.1942	38.4725	43.5347	50.427	55.2862	62.4246
Species	H298[kcal/mol]	S298[cal/mol/K]	Cp300	Cp400	Cp500	Cp600	Cp800	Cp1000	Cp1500
C10H11	52.9617	98.0708	38.752	50.4413	60.7069	69.2356	81.2666	89.8097	102.146
C10H7O	71.6413	99.0503	38.6684	49.0079	57.7469	64.804	74.4866	81.1543	90.438
C10H9	92.944	95.8443	38.0162	48.2076	57.0493	64.3812	74.8736	82.356	93.2307
C10H9O	33.3624	101.991	41.1386	52.0706	61.6434	69.5748	80.7004	88.4479	99.2892
C11H11	72.7522	101.456	44.402	56.8773	67.6517	76.405	88.2401	96.5634	108.516
C11H7	154.939	96.6685	39.9608	50.1379	58.4564	65.0955	74.4102	80.9393	90.3424
C11H9	112.211	99.7192	41.3393	53.0095	62.7543	70.5567	81.2332	88.6964	99.3513
C7H7	50.1786	75.717	25.8108	33.8402	40.7778	46.4661	54.388	60.0427	68.2418
C7H7O	8.79869	84.1597	30.0441	38.2957	45.3862	51.1676	59.1373	64.7753	73.0078
C8H7O	19.3294	87.9893	31.5682	40.6512	48.5349	55.0211	64.0634	70.4062	79.3459
C8H7O2	-31.9027	92.612	34.4995	44.1798	52.6703	59.7465	69.8233	76.9186	86.8473
C8H9	42.7416	85.562	30.1301	39.397	47.7274	54.7344	64.6463	71.7918	82.1649
C8H9O	-0.745368	93.859	34.2105	43.8573	52.3549	59.4144	69.3359	76.4361	86.8593
C9H11	35.6033	93.4481	34.9869	45.4221	54.9852	63.1413	74.8665	83.3833	95.8777
C9H7	100.754	87.2678	32.4402	41.5949	49.3185	55.5753	64.2928	70.4516	79.31
C9H9	58.7766	88.6677	33.8641	44.5501	53.8719	61.4666	71.67	78.8083	88.8397
C9H9O	11.4099	97.39	36.3701	46.5759	55.647	63.2631	74.145	81.8448	92.9249
C6H5	81.5079	68.9011	19.0881	25.4691	31.1119	35.7657	42.1133	46.5974	53.0167
C6H5O	13.8108	74.2095	22.9893	29.9366	35.9329	40.8208	47.4957	52.1447	58.767

## Sheet: NNIs
group-additivity	H298[kcal/mol]	S298[cal/mol/K]	Cp300	Cp400	Cp500	Cp600	Cp800	Cp1000	Cp1500	RA[cal/mol/K]	symmetry number	radical isomer			this work	H298[kcal/mol]	S298[cal/mol/K]	Cp300	Cp400	Cp500	Cp600	Cp800	Cp1000	Cp1500		NNIs	H298[kcal/mol]	S298[cal/mol/K]	Cp300	Cp400	Cp500	Cp600	Cp800	Cp1000	Cp1500
o-OH…OH	-63.6716	82.5753	30.1604	37.7483	44.1849	49.2695	55.614	60.1125	66.4691	1.37728	2	1			o-OH…OH	-64.8637	78.235	28.7229	36.9005	43.9027	49.6936	57.9834	63.3993	70.1171		o-OH…OH	-1.19214	-4.34031	-1.43747	-0.847834	-0.282259	0.424095	2.3694	3.28681	3.64801
m-OH…OH	-63.6716	82.5753	30.1604	37.7483	44.1849	49.2695	55.614	60.1125	66.4691	1.37728	2	1			m-OH…OH	-63.9081	81.668	31.229	38.6755	44.7316	49.5072	56.0244	60.5683	67.3913		m-OH…OH	-0.236543	-0.907312	1.06859	0.927193	0.546724	0.237753	0.410415	0.455841	0.922161
p-OH…OH	-63.6716	81.198	30.1604	37.7483	44.1849	49.2695	55.614	60.1125	66.4691	2.75457	4	1			p-OH…OH	-62.1594	81.754	30.2232	37.696	43.7713	48.5946	55.3125	60.0236	67.1046		p-OH…OH	1.51221	0.555975	0.062821	-0.052297	-0.413654	-0.674845	-0.301507	-0.088851	0.635481
o-OH…CH3	-29.8792	85.2928	30.0935	38.4674	46.0459	52.3441	60.7074	66.7993	75.5234	2.18294	3	1			o-OH…CH3	-30.529	84.2361	30.7273	38.9741	46.2367	52.2952	60.9099	67.1142	76.3739		o-OH…CH3	-0.64984	-1.05665	0.633792	0.506729	0.190763	-0.048927	0.202572	0.31489	0.850491
m-OH…CH3	-29.8792	85.2928	30.0935	38.4674	46.0459	52.3441	60.7074	66.7993	75.5234	2.18294	3	1			m-OH…CH3	-30.3427	85.1774	29.8625	38.4701	45.9524	52.1375	60.8717	67.1261	76.4122		m-OH…CH3	-0.463498	-0.115384	-0.231026	0.00265	-0.093528	-0.206601	0.164348	0.326835	0.888715
p-OH…CH3	-29.8792	83.9155	30.0935	38.4674	46.0459	52.3441	60.7074	66.7993	75.5234	3.56023	6	1			p-OH…CH3	-29.7884	83.842	29.8147	38.3745	45.8234	51.9918	60.7451	67.0234	76.3572		p-OH…CH3	0.09075	-0.0735514	-0.278806	-0.09291	-0.222534	-0.35233	0.037731	0.224108	0.833768
o-CHO…CHO	-38.2001	91.1805	33.2709	41.6997	49.4789	56.0495	64.9216	71.1449	#VALUE!	1.37728	2	1			o-CHO…CHO	-33.7709	89.2554	34.2081	42.8802	50.4772	56.8534	66.0821	72.2768	80.4137		o-CHO…CHO	4.42917	-1.92503	0.937195	1.18043	0.998245	0.803946	1.16056	1.13193	#VALUE!
m-CHO…CHO	-38.2001	91.1805	33.2709	41.6997	49.4789	56.0495	64.9216	71.1449	#VALUE!	1.37728	2	1			m-CHO…CHO	-37.524	90.6195	34.0122	42.4549	49.9325	56.2299	65.3105	71.5864	80.1486		m-CHO…CHO	0.676055	-0.560907	0.741297	0.755185	0.453553	0.180417	0.388914	0.441507	#VALUE!
p-CHO…CHO	-38.2001	89.8032	33.2709	41.6997	49.4789	56.0495	64.9216	71.1449	#VALUE!	2.75457	4	1			p-CHO…CHO	-37.1537	89.7786	33.3648	42.0106	49.6578	56.0674	65.2245	71.5338	80.0936		p-CHO…CHO	1.04635	-0.024552	0.093878	0.310831	0.178818	0.017965	0.30291	0.388949	#VALUE!
o-CH3…CHO	-17.1434	89.5954	31.6488	40.4431	48.693	55.7341	65.3611	72.3155	#VALUE!	2.18294	3	1			o-CH3…CHO	-16.3742	87.5568	33.3289	42.0106	49.7557	56.3422	66.0463	72.9409	82.8864		o-CH3…CHO	0.769226	-2.03853	1.68017	1.56744	1.06275	0.608048	0.68515	0.62546	#VALUE!
m-CH3…CHO	-17.1434	89.5954	31.6488	40.4431	48.693	55.7341	65.3611	72.3155	#VALUE!	2.18294	3	1			m-CH3…CHO	-17.7216	89.5039	31.5276	40.5485	48.6783	55.5777	65.5494	72.6519	82.8099		m-CH3…CHO	-0.57817	-0.0914939	-0.121132	0.105377	-0.014691	-0.156432	0.188238	0.336391	#VALUE!
p-CH3…CHO	-17.1434	89.5954	31.6488	40.4431	48.693	55.7341	65.3611	72.3155	#VALUE!	2.18294	3	1			p-CH3…CHO	-17.9438	89.1193	31.4775	40.5151	48.6472	55.5466	65.5279	72.6399	82.829		p-CH3…CHO	-0.800347	-0.476123	-0.171301	0.071931	-0.045748	-0.187489	0.166737	0.324446	#VALUE!
o-CH3…CH3	3.91321	85.2557	30.0266	39.1865	47.907	55.4188	65.8007	73.4861	84.5778	5.74317	18	1			o-CH3…CH3	3.98485	83.0584	31.0259	40.0731	48.4083	55.6016	66.1992	73.9467	85.5286		o-CH3…CH3	0.071638	-2.19737	0.999309	0.88658	0.501333	0.182806	0.39847	0.460619	0.950829
m-CH3…CH3	3.91321	85.2557	30.0266	39.1865	47.907	55.4188	65.8007	73.4861	84.5778	5.74317	18	1			m-CH3…CH3	3.60739	85.1655	29.8004	39.1772	47.7848	55.1692	65.9316	73.7867	85.4569		m-CH3…CH3	-0.305824	-0.0902744	-0.226248	-0.009295	-0.122196	-0.249603	0.130902	0.300556	0.879159
p-CH3…CH3	3.91321	83.8785	30.0266	39.1865	47.907	55.4188	65.8007	73.4861	84.5778	7.12045	36	1			p-CH3…CH3	3.76984	83.8897	29.8816	39.256	47.8541	55.2265	65.9794	73.8249	85.4856		p-CH3…CH3	-0.143372	0.011283	-0.145022	0.069542	-0.052915	-0.192267	0.178682	0.33878	0.907827
group-additivity	H298[kcal/mol]	S298[cal/mol/K]	Cp300	Cp400	Cp500	Cp600	Cp800	Cp1000	Cp1500
CH3-CH3	3.91321	90.9989	30.0266	39.1865	47.907	55.4188	65.8007	73.4861	84.5778
CH3-OH	-29.8792	87.4757	30.0935	38.4674	46.0459	52.3441	60.7074	66.7993	75.5234
OH-OH	-63.6716	83.9526	30.1604	37.7483	44.1849	49.2695	55.614	60.1125	66.4691
CH3-CHO	-17.1434	91.7783	31.6488	40.4431	48.693	55.7341	65.3611	72.3155	#VALUE!
CHO-CHO	-38.2001	92.5577	33.2709	41.6997	49.4789	56.0495	64.9216	71.1449	#VALUE!
GAVs from this work, except for CB/H, which is from THERM database
CB/O	-0.9	-10.2	3.9	5.3	6.2	6.6	6.9	6.9	7.07
O/CB/H,	-37.5358	29.1163	4.70021	4.69416	4.97246	5.43475	5.82701	6.33624	6.70457
C/CB/O/H2	-6.627	7.68963	6.19387	7.94476	9.40394	10.471	11.2142	11.9561	12.2537
O/C/H,	-38.1	30.09	4.5	4.6	4.89	5.35	6.46	7.25	9.28
C/CB/H3	-10.1534	30.1295	5.86332	7.57325	9.35349	10.9594	12.8604	14.483	16.8489
CB/C,	5.51	-7.69	2.67	3.14	3.68	4.15	4.96	5.44	5.98
CB/H	3.3	11.53	3.24	4.44	5.46	6.3	7.54	8.41	9.73
CB/CO,	6.94	-9.98	2.93	3.67	4.42	4.93	5.54	6.09	5.75
CO/CB/H	-32.64	33.1989	7.22545	8.29987	9.39947	10.4947	11.8408	12.6624	#VALUE!
CB/H	3.3	11.53	3.24	4.44	5.46	6.3	7.54	8.41	9.73
