# Supplementary material for: An extensive theoretical study on the thermochemistry of aromatic compounds: from electronic structure to group additivity values
Source: Royal Society of Chemistry journal article supplement (doi:10.1039/d2cp01459a), 2022-01-01
Supplement: d2cp01459a2.pdf [file d2cp01459a2.pdf]

## An Extensive Theoretical Study on the Thermochemistry of Aromatic Compounds: From Electronic Structure to Group Additivity Values

Shan Zhu<sup>1</sup>, Zhuofan Xiong<sup>1</sup>, Chong-Wen Zhou<sup>1,2\*</sup>

<sup>1</sup>School of Energy and Power Engineering, Beihang University, Beijing 100191, PR China

<sup>2</sup>Combustion Chemistry Centre, School of Chemistry, Ryan Institute, National University of Ireland, Galway, Galway H91TK33, Ireland.

Email: [chongwen.zhou@nuigalway.ie](mailto:chongwen.zhou@nuigalway.ie)

### Supporting Information

Table S1 0 K enthalpies of formation for reference species in isodesmic reactions from ATcT (kcal/mol)

| Species       | $\Delta H_f(0K)$ | Species   | $\Delta H_f(0K)$ |
|---------------|------------------|-----------|------------------|
| Anisole       | -11.42           | Propylene | 8.34             |
| Styrene       | 40.53            | Ethylene  | 14.54            |
| Methylbenzene | 17.51            | Ethane    | -16.33           |
| Formic acid   | -88.66           | Methane   | -15.90           |
| Methanol      | -45.39           |           |                  |

Table S 2 Thermochemistry comparison of monosubstituted aromatics against Sabbe et al.

| Species                                                                                                   | Resource     | $\Delta H_f(298.15\text{K})$<br>[kcal/mol] | $S(298.15\text{K})$<br>[cal/mol/K] | $C_p$ [cal/mol/K] |       |       |       |       |        |        |
|-----------------------------------------------------------------------------------------------------------|--------------|--------------------------------------------|------------------------------------|-------------------|-------|-------|-------|-------|--------|--------|
|                                                                                                           |              |                                            |                                    | 300 K             | 400 K | 500 K | 600 K | 800 K | 1000 K | 1500 K |
| 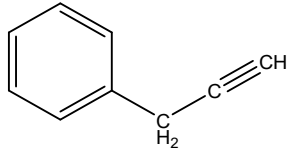<br>3-phenyl-1-propyne   | This work    | 72.9                                       | 89.1                               | 31.9              | 41.3  | 49.5  | 56.2  | 65.7  | 72.6   | 82.6   |
|                                                                                                           | Sabbe et al. | 73.5                                       | 88.8                               | 31.8              | 41.5  | 49.5  | 56.1  | 65.8  | 72.6   |        |
| <br>alpha-methyl-styrene | This work    | 27.8                                       | 90.1                               | 34.1              | 44.3  | 53.3  | 60.9  | 71.7  | 79.6   | 91.3   |
|                                                                                                           | Sabbe et al. | 27.9                                       | 90.3                               | 33.9              | 44.4  | 53.3  | 60.7  | 71.7  | 79.5   |        |
| <br>3-phenylpropene     | This work    | 32.1                                       | 93.0                               | 33.6              | 43.9  | 53.1  | 60.8  | 71.7  | 79.6   | 91.3   |
|                                                                                                           | Sabbe et al. | 32.5                                       | 93.2                               | 33.7              | 44.2  | 53.2  | 60.6  | 71.7  | 79.5   |        |

|                                                                                                                  |              |      |      |      |      |      |      |      |      |       |
|------------------------------------------------------------------------------------------------------------------|--------------|------|------|------|------|------|------|------|------|-------|
| 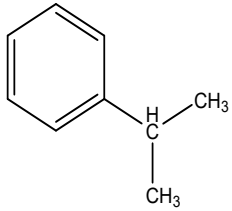 <p>2-phenylpropane</p>         | This work    | 0.3  | 93.1 | 36.3 | 47.4 | 57.4 | 65.8 | 77.9 | 86.7 | 100.0 |
|                                                                                                                  | Sabbe et al. | 0.7  | 92.3 | 36.6 | 47.9 | 57.7 | 65.8 | 78.0 | 86.7 |       |
|  <p>3-phenyl-3-buten-1-yne</p>  | This work    | 92.1 | 92.6 | 35.7 | 45.9 | 54.6 | 61.6 | 71.4 | 78.3 | 88.5  |
|                                                                                                                  | Sabbe et al. | 92.7 | 92.8 | 35.9 | 46.3 | 54.9 | 61.6 | 71.4 | 78.2 |       |
|  <p>2-phenyl-1,3-butadiene</p> | This work    | 50.5 | 95.5 | 38.7 | 49.6 | 59.0 | 66.8 | 77.7 | 85.6 | 97.2  |
|                                                                                                                  | Sabbe et al. | 50.8 | 93.5 | 38.5 | 50.0 | 59.4 | 66.9 | 77.9 | 85.6 |       |
|  <p>3-phenyl-1-butyne</p>     | This work    | 66.1 | 97.0 | 38.7 | 49.4 | 58.7 | 66.4 | 77.3 | 85.2 | 97.0  |

|                                                                                                               |              |       |       |      |      |      |      |      |      |       |
|---------------------------------------------------------------------------------------------------------------|--------------|-------|-------|------|------|------|------|------|------|-------|
|                                                                                                               | Sabbe et al. | 66.8  | 97.1  | 38.7 | 49.7 | 58.8 | 66.3 | 77.3 | 85.2 |       |
| 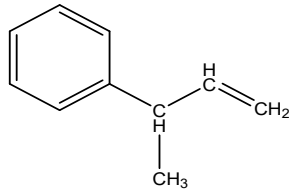<br>3-phenyl-1-butene        | This work    | 25.8  | 100.7 | 39.9 | 51.3 | 61.7 | 70.5 | 83.0 | 92.1 | 105.6 |
|                                                                                                               | Sabbe et al. | 26.1  | 102.2 | 39.0 | 51.0 | 61.3 | 69.8 | 82.6 | 91.6 |       |
| <br>1-phenyl-1-ethyl         | This work    | 42.7  | 85.6  | 30.1 | 39.4 | 47.7 | 54.7 | 64.6 | 71.8 | 82.2  |
|                                                                                                               | Sabbe et al. | 43.7  | 85.8  | 29.8 | 39.3 | 47.5 | 54.2 | 64.3 | 71.4 |       |
| <br>3-phenyl-1-propyn-3-yl  | This work    | 100.8 | 87.3  | 32.4 | 41.6 | 49.3 | 55.6 | 64.3 | 70.5 | 79.3  |
|                                                                                                               | Sabbe et al. | 101.5 | 87.7  | 32.7 | 41.9 | 49.5 | 55.4 | 64.2 | 70.2 |       |
| <br>3-phenyl-1-propen-3-yl | This work    | 58.8  | 88.7  | 33.9 | 44.6 | 53.9 | 61.5 | 71.7 | 78.8 | 88.8  |

|                                                                                                             |              |      |      |      |      |      |      |      |      |       |
|-------------------------------------------------------------------------------------------------------------|--------------|------|------|------|------|------|------|------|------|-------|
|                                                                                                             | Sabbe et al. | 59.3 | 88.8 | 33.4 | 43.9 | 52.7 | 59.8 | 70.3 | 77.7 |       |
| 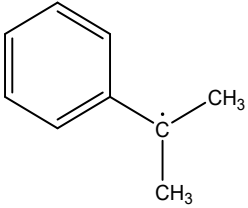<br>2-phenyl-2-propyl      | This work    | 35.6 | 93.4 | 35.0 | 45.4 | 55.0 | 63.1 | 74.9 | 83.4 | 95.9  |
|                                                                                                             | Sabbe et al. | 35.9 | 93.8 | 34.4 | 45.2 | 54.8 | 62.6 | 74.6 | 83.1 |       |
| <br>3-phenyl-1-butyn-3-yl  | This work    | 92.9 | 95.8 | 38.0 | 48.2 | 57.0 | 64.4 | 74.9 | 82.3 | 93.2  |
|                                                                                                             | Sabbe et al. | 93.8 | 96.1 | 38.0 | 48.4 | 57.0 | 64.1 | 74.6 | 82.1 |       |
| <br>3-phenyl-1-buten-3-yl | This work    | 53.0 | 98.1 | 38.8 | 50.4 | 60.7 | 69.2 | 81.3 | 89.8 | 102.2 |
|                                                                                                             | Sabbe et al. | 53.2 | 96.2 | 38.3 | 50.0 | 60.2 | 68.4 | 80.7 | 89.4 |       |

|                                                                                                                  |              |       |       |      |      |      |      |      |      |       |
|------------------------------------------------------------------------------------------------------------------|--------------|-------|-------|------|------|------|------|------|------|-------|
| 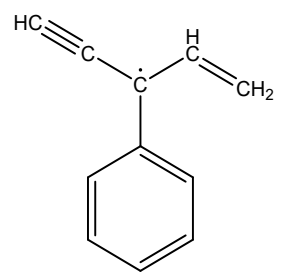<br>3-phenyl-1-penten-4-yn-3-yl | This work    | 112.2 | 99.7  | 41.3 | 53.0 | 62.8 | 70.6 | 81.2 | 88.7 | 99.4  |
|                                                                                                                  | Sabbe et al. | 113.0 | 100.0 | 41.1 | 52.6 | 62.0 | 69.6 | 80.6 | 88.3 |       |
| <br>3-phenyl-1,4-pentadien-3-yl | This work    | 72.8  | 101.5 | 44.4 | 56.9 | 67.7 | 76.4 | 88.2 | 96.6 | 108.5 |
|                                                                                                                  | Sabbe et al. | 75.4  | 98.5  | 41.8 | 54.6 | 65.4 | 74.1 | 86.8 | 95.8 |       |

Table S 3 Thermochemistry of monosubstituted aromatics.

| No. | Species | $\sigma_{\text{ext}}$ | $\sigma_{\text{int}}$ | $n_{\text{opt}}$ | $\Delta H_f(298.15\text{K})$<br>[kcal/mol] | $S(298.15\text{K})$<br>[cal/mol/K] | $C_p$ [cal/mol/K] |       |       |       |       |        |
|-----|---------|-----------------------|-----------------------|------------------|--------------------------------------------|------------------------------------|-------------------|-------|-------|-------|-------|--------|
|     |         |                       |                       |                  |                                            |                                    | 300 K             | 400 K | 500 K | 600 K | 800 K | 1000 K |

|   |                                                                                     |    |      |   |      |      |      |      |      |      |      |      |       |
|---|-------------------------------------------------------------------------------------|----|------|---|------|------|------|------|------|------|------|------|-------|
| 1 | 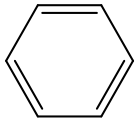   | 12 | none | 1 | 20.1 | 64.2 | 19.6 | 26.5 | 32.8 | 38.0 | 45.0 | 50.1 | 57.5  |
| 2 |    | 1  | 6    | 1 | 11.9 | 76.5 | 24.7 | 32.9 | 40.3 | 46.6 | 55.5 | 62.0 | 71.5  |
| 3 |    | 1  | 6    | 1 | 6.9  | 86.3 | 30.3 | 39.9 | 48.6 | 56.1 | 66.6 | 74.3 | 85.7  |
| 4 |    | 1  | 18   | 1 | 0.3  | 93.1 | 36.3 | 47.4 | 57.4 | 65.8 | 77.9 | 86.7 | 100.0 |
| 5 |   | 1  | 2    | 1 | 35.4 | 82.0 | 28.3 | 37.4 | 45.4 | 52.1 | 61.3 | 67.8 | 77.4  |
| 6 |  | 1  | 6    | 1 | 27.8 | 90.1 | 34.1 | 44.3 | 53.3 | 60.9 | 71.7 | 79.6 | 91.2  |

|    |                                                                                     |   |      |   |      |       |      |      |      |      |      |      |       |
|----|-------------------------------------------------------------------------------------|---|------|---|------|-------|------|------|------|------|------|------|-------|
| 7  | 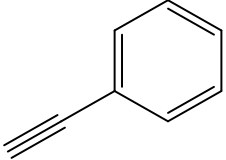   | 2 | none | 1 | 76.1 | 78.3  | 27.5 | 35.5 | 42.2 | 47.7 | 55.3 | 60.7 | 68.7  |
| 8  |    | 1 | 2    | 1 | 32.1 | 93.0  | 33.6 | 43.9 | 53.1 | 60.8 | 71.7 | 79.6 | 91.3  |
| 9  |    | 1 | 6    | 2 | 25.8 | 100.7 | 39.9 | 51.3 | 61.7 | 70.5 | 83.0 | 92.1 | 105.6 |
| 10 |    | 1 | 2    | 1 | 72.9 | 89.1  | 31.9 | 41.3 | 49.5 | 56.2 | 65.8 | 72.6 | 82.6  |
| 11 |   | 1 | 6    | 2 | 66.1 | 97.0  | 38.7 | 49.4 | 58.7 | 66.4 | 77.3 | 85.2 | 97.0  |
| 12 |  | 1 | 2    | 1 | 51.5 | 109.7 | 44.7 | 56.5 | 66.9 | 75.7 | 88.3 | 97.5 | 111.2 |



|    |                                                                                     |   |   |   |       |       |      |      |      |      |      |      |       |
|----|-------------------------------------------------------------------------------------|---|---|---|-------|-------|------|------|------|------|------|------|-------|
| 13 | 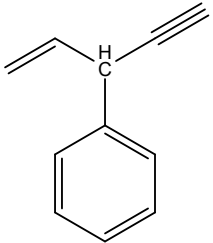   | 1 | 2 | 2 | 92.1  | 103.7 | 41.5 | 53.0 | 62.8 | 70.9 | 82.2 | 90.4 | 102.5 |
| 14 |    | 1 | 2 | 1 | 136.4 | 99.3  | 39.2 | 49.8 | 58.7 | 66.0 | 76.0 | 83.2 | 93.8  |
| 15 |    | 1 | 2 | 1 | 50.5  | 95.5  | 38.7 | 49.6 | 59.0 | 66.8 | 77.7 | 85.6 | 97.2  |
| 16 |   | 1 | 2 | 1 | 92.1  | 92.6  | 35.7 | 45.9 | 54.6 | 61.6 | 71.4 | 78.3 | 88.5  |
| 17 |  | 4 | 2 | 1 | 42.1  | 92.7  | 39.3 | 52.5 | 64.0 | 73.5 | 86.5 | 95.6 | 108.7 |

|    |                                                                                     |   |   |   |       |      |      |      |      |      |      |      |      |
|----|-------------------------------------------------------------------------------------|---|---|---|-------|------|------|------|------|------|------|------|------|
| 18 | 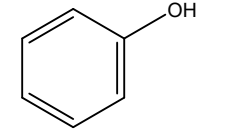   | 1 | 2 | 1 | -21.9 | 75.2 | 24.8 | 32.2 | 38.5 | 43.5 | 50.4 | 55.3 | 62.4 |
| 19 |    | 1 | 2 | 2 | -0.1  | 86.3 | 27.9 | 35.4 | 42.0 | 47.4 | 54.8 | 60.0 | 67.4 |
| 20 |    | 1 | 6 | 1 | -17.1 | 82.5 | 29.4 | 38.1 | 45.8 | 52.1 | 60.9 | 67.3 | 76.6 |
| 21 |    | 1 | 2 | 1 | 4.4   | 91.1 | 31.9 | 41.2 | 49.4 | 56.1 | 65.5 | 72.2 | 82.0 |
| 22 |   | 1 | 2 | 1 | 56.0  | 85.7 | 31.4 | 40.1 | 47.2 | 52.9 | 60.6 | 66.0 | 73.8 |
| 23 |  | 1 | 2 | 1 | -53.3 | 88.1 | 29.4 | 38.1 | 45.7 | 52.0 | 60.4 | 66.1 | 73.9 |
| 24 |  | 1 | 2 | 1 | -9.2  | 79.5 | 26.4 | 34.2 | 41.1 | 46.9 | 55.1 | 60.8 | 68.8 |

|    |                                                                                     |   |   |   |       |      |      |      |      |      |      |      |      |
|----|-------------------------------------------------------------------------------------|---|---|---|-------|------|------|------|------|------|------|------|------|
| 25 | 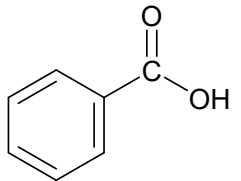   | 1 | 2 | 1 | -71.0 | 84.5 | 29.9 | 38.5 | 46.0 | 52.2 | 60.9 | 67.2 | 75.6 |
| 26 |    | 1 | 6 | 1 | -20.2 | 87.9 | 32.3 | 41.4 | 49.5 | 56.3 | 65.9 | 72.7 | 82.6 |
| 27 |    | 1 | 2 | 1 | 5.9   | 93.3 | 35.3 | 45.6 | 54.4 | 61.7 | 71.7 | 78.6 | 88.5 |
| 28 |   | 1 | 2 | 1 | -22.7 | 86.4 | 29.6 | 37.9 | 45.3 | 51.5 | 60.3 | 66.7 | 76.2 |
| 29 |  | 1 | 6 | 2 | -32.6 | 93.7 | 36.9 | 46.5 | 54.9 | 61.9 | 72.1 | 79.5 | 90.6 |

|    |                                                                                    |   |    |   |       |      |      |      |      |      |      |      |       |
|----|------------------------------------------------------------------------------------|---|----|---|-------|------|------|------|------|------|------|------|-------|
| 30 | 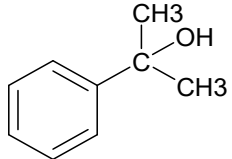  | 1 | 18 | 1 | -41.5 | 98.8 | 41.6 | 53.1 | 63.3 | 71.7 | 83.6 | 92.1 | 105.0 |
| 31 |   | 1 | 2  | 2 | -51.9 | 95.4 | 36.4 | 47.2 | 56.6 | 64.1 | 73.7 | 80.0 | 88.6  |
| 32 |   | 1 | 2  | 1 | -12.1 | 92.7 | 30.6 | 39.8 | 48.1 | 55.1 | 64.8 | 71.8 | 81.9  |
| 33 |  | 1 | 6  | 2 | -19.2 | 98.9 | 39.0 | 49.3 | 58.2 | 65.6 | 76.6 | 84.5 | 96.3  |

|    |                                                                                     |   |   |   |       |       |      |      |      |      |      |      |       |
|----|-------------------------------------------------------------------------------------|---|---|---|-------|-------|------|------|------|------|------|------|-------|
| 34 | 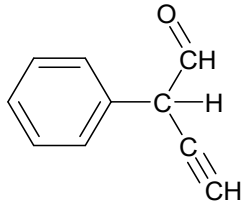   | 1 | 2 | 2 | 48.4  | 102.0 | 40.7 | 50.8 | 59.4 | 66.3 | 76.2 | 83.2 | 93.4  |
| 35 |    | 1 | 2 | 2 | 7.3   | 105.3 | 42.7 | 53.5 | 62.9 | 70.8 | 82.0 | 90.1 | 102.0 |
| 36 |    | 1 | 2 | 1 | 7.7   | 94.2  | 35.8 | 45.5 | 54.1 | 61.2 | 71.3 | 78.3 | 88.4  |
| 37 |  | 1 | 2 | 2 | -5.5  | 95.7  | 33.2 | 42.0 | 49.8 | 56.4 | 65.6 | 72.1 | 81.6  |
| 38 |  | 1 | 6 | 4 | -15.4 | 102.4 | 40.7 | 50.7 | 59.6 | 67.1 | 77.6 | 85.1 | 96.2  |

|    |                                                                                     |   |    |   |       |       |      |      |      |      |      |      |       |
|----|-------------------------------------------------------------------------------------|---|----|---|-------|-------|------|------|------|------|------|------|-------|
| 39 | 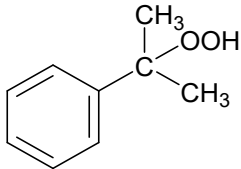   | 1 | 18 | 2 | -24.1 | 106.4 | 47.6 | 59.5 | 69.7 | 78.1 | 89.8 | 98.3 | 110.8 |
| 40 |    | 1 | 6  | 1 | 53.0  | 98.1  | 38.8 | 50.4 | 60.7 | 69.2 | 81.3 | 89.8 | 102.1 |
| 41 |    | 1 | 2  | 1 | 71.6  | 99.1  | 38.7 | 49.0 | 57.7 | 64.8 | 74.5 | 81.2 | 90.4  |
| 42 |  | 1 | 6  | 1 | 92.9  | 95.8  | 38.0 | 48.2 | 57.0 | 64.4 | 74.9 | 82.4 | 93.2  |

|    |                                                                                     |   |   |   |       |       |      |      |      |      |      |      |       |
|----|-------------------------------------------------------------------------------------|---|---|---|-------|-------|------|------|------|------|------|------|-------|
| 43 | 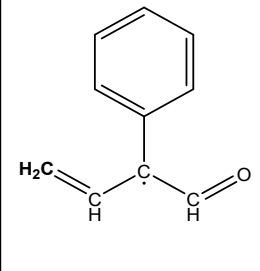   | 1 | 2 | 1 | 33.4  | 102.0 | 41.1 | 52.1 | 61.6 | 69.6 | 80.7 | 88.4 | 99.3  |
| 44 |    | 2 | 2 | 1 | 72.8  | 101.5 | 44.4 | 56.9 | 67.7 | 76.4 | 88.2 | 96.6 | 108.5 |
| 45 |   | 2 | 2 | 1 | 154.9 | 96.7  | 40.0 | 50.1 | 58.5 | 65.1 | 74.4 | 80.9 | 90.3  |
| 46 |  | 1 | 2 | 1 | 112.2 | 99.7  | 41.3 | 53.0 | 62.8 | 70.6 | 81.2 | 88.7 | 99.4  |

|    |                                                                                     |   |   |   |       |      |      |      |      |      |      |      |      |
|----|-------------------------------------------------------------------------------------|---|---|---|-------|------|------|------|------|------|------|------|------|
| 47 | 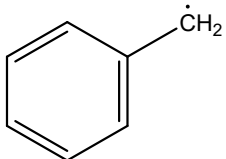   | 2 | 2 | 1 | 50.2  | 75.7 | 25.8 | 33.8 | 40.8 | 46.5 | 54.4 | 60.0 | 68.2 |
| 48 |    | 1 | 2 | 1 | 8.8   | 84.2 | 30.0 | 38.3 | 45.4 | 51.2 | 59.1 | 64.8 | 73.0 |
| 49 |    | 1 | 2 | 1 | 19.3  | 88.0 | 31.6 | 40.7 | 48.5 | 55.0 | 64.1 | 70.4 | 79.3 |
| 50 |   | 1 | 2 | 1 | -31.9 | 92.6 | 34.5 | 44.2 | 52.7 | 59.7 | 69.8 | 76.9 | 86.8 |
| 51 |  | 1 | 6 | 1 | 42.7  | 85.6 | 30.1 | 39.4 | 47.7 | 54.7 | 64.6 | 71.8 | 82.2 |



|    |                                                                                     |   |    |   |       |      |      |      |      |      |      |      |      |
|----|-------------------------------------------------------------------------------------|---|----|---|-------|------|------|------|------|------|------|------|------|
| 52 | 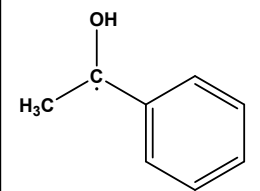   | 1 | 6  | 1 | -0.7  | 93.9 | 34.2 | 43.9 | 52.4 | 59.4 | 69.3 | 76.4 | 86.9 |
| 53 |    | 2 | 18 | 1 | 35.6  | 93.4 | 35.0 | 45.4 | 55.0 | 63.1 | 74.9 | 83.4 | 95.9 |
| 54 |    | 1 | 2  | 1 | 100.8 | 87.3 | 32.4 | 41.6 | 49.3 | 55.6 | 64.3 | 70.5 | 79.3 |
| 55 |   | 1 | 2  | 1 | 58.8  | 88.7 | 33.9 | 44.6 | 53.9 | 61.5 | 71.7 | 78.8 | 88.8 |
| 56 |  | 1 | 6  | 1 | 11.4  | 97.4 | 36.4 | 46.6 | 55.6 | 63.3 | 74.1 | 81.8 | 92.9 |

|    |                                                                                   |   |      |   |      |      |      |      |      |      |      |      |      |
|----|-----------------------------------------------------------------------------------|---|------|---|------|------|------|------|------|------|------|------|------|
| 57 | 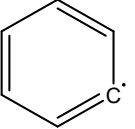 | 2 | none | 1 | 81.5 | 68.9 | 19.1 | 25.5 | 31.1 | 35.8 | 42.1 | 46.6 | 53.0 |
| 58 |  | 2 | none | 1 | 13.8 | 74.2 | 23.0 | 29.9 | 35.9 | 40.8 | 47.5 | 52.1 | 58.8 |

Table S 4 Thermochemistry comparison with hindered rotor potentials calculated at M06-X/6-31G and M06-X/6-311++G(d,p) level of theory.

| Species                                                                                               | Methods             | $\Delta H_f(298.15\text{K})$<br>[kcal/mol] | $S(298.15\text{K})$<br>[cal/mol/K] | $C_p$ [cal/mol/K] |       |       |       |       |        |        |
|-------------------------------------------------------------------------------------------------------|---------------------|--------------------------------------------|------------------------------------|-------------------|-------|-------|-------|-------|--------|--------|
|                                                                                                       |                     |                                            |                                    | 300 K             | 400 K | 500 K | 600 K | 800 K | 1000 K | 1500 K |
| 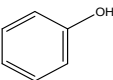<br>Phenol           | M06-X/6-31G         | -21.94                                     | 75.19                              | 24.80             | 32.19 | 38.47 | 43.53 | 50.43 | 55.29  | 62.42  |
|                                                                                                       | M06-X/6-311++G(d,p) | -21.92                                     | 75.33                              | 24.81             | 32.14 | 38.38 | 43.42 | 50.33 | 55.21  | 62.38  |
| <br>Benzaldehyde     | M06-X/6-31G         | -9.20                                      | 79.49                              | 26.36             | 34.17 | 41.12 | 46.92 | 55.08 | 60.80  | 68.82  |
|                                                                                                       | M06-X/6-311++G(d,p) | -9.18                                      | 79.70                              | 26.37             | 34.19 | 41.15 | 46.95 | 55.08 | 60.75  | 68.68  |
| <br>Benzyl radical | M06-X/6-31G         | 50.18                                      | 75.72                              | 25.81             | 33.84 | 40.78 | 46.47 | 54.39 | 60.04  | 68.24  |
|                                                                                                       | M06-X/6-311++G(d,p) | 50.18                                      | 75.75                              | 25.83             | 33.85 | 40.79 | 46.47 | 54.39 | 60.04  | 68.22  |
| <br>Anisole        | M06-X/6-31G         | -17.13                                     | 82.49                              | 29.42             | 38.14 | 45.78 | 52.10 | 60.92 | 67.26  | 76.60  |

|         |                     |        |       |       |       |       |       |       |       |       |
|---------|---------------------|--------|-------|-------|-------|-------|-------|-------|-------|-------|
| Anisole | M06-X/6-311++G(d,p) | -17.14 | 82.46 | 29.41 | 38.14 | 45.78 | 52.10 | 60.93 | 67.28 | 76.63 |
|---------|---------------------|--------|-------|-------|-------|-------|-------|-------|-------|-------|

Table S 5 The total symmetry number ( $\sigma_{\text{total sysm}}$ ) and optical isomer number ( $n_{\text{opt}}$ ) of disubstituted aromatics

| Species                                                                                                     | $\sigma_{\text{ext}}$ | $\sigma_{\text{int}}$ | $n_{\text{opt}}$ | Species                                                                                                      | $\sigma_{\text{ext}}$ | $\sigma_{\text{int}}$ | $n_{\text{opt}}$ | Species                                                                                                       | $\sigma_{\text{ext}}$ | $\sigma_{\text{int}}$ | $n_{\text{opt}}$ |
|-------------------------------------------------------------------------------------------------------------|-----------------------|-----------------------|------------------|--------------------------------------------------------------------------------------------------------------|-----------------------|-----------------------|------------------|---------------------------------------------------------------------------------------------------------------|-----------------------|-----------------------|------------------|
| 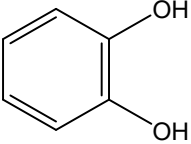<br>O-dihydroxybenzene     | 2                     | 1                     | 1                | <br>M-dihydroxybenzene     | 2                     | 1                     | 1                | <br>P-dihydroxybenzene     | 4                     | 1                     | 1                |
| <br>O-methylphenol         | 1                     | 3                     | 1                | <br>M-methylphenol         | 1                     | 3                     | 1                | <br>P-methylphenol         | 2                     | 3                     | 1                |
| <br>O-phthalaldehyde      | 2                     | 1                     | 1                | <br>M-phthalaldehyde      | 2                     | 1                     | 1                | <br>P-phthalaldehyde      | 4                     | 1                     | 1                |
| <br>O-methylbenzaldehyde | 1                     | 3                     | 1                | <br>M-methylbenzaldehyde | 1                     | 3                     | 1                | <br>P-methylbenzaldehyde | 1                     | 3                     | 1                |

| O-methylbenzaldehyde                                                                          |   |   |   | M-methylbenzaldehyde                                                                           |   |   |   | P-methylbenzaldehyde                                                                            |   |   |   |
|-----------------------------------------------------------------------------------------------|---|---|---|------------------------------------------------------------------------------------------------|---|---|---|-------------------------------------------------------------------------------------------------|---|---|---|
| 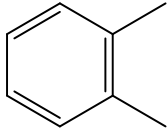<br>O-xylene | 2 | 9 | 1 | <br>M-xylene | 2 | 9 | 1 | <br>P-xylene | 4 | 9 | 1 |

Table S 6 Thermochemistry of dicyclic aromatics.

| No. | Species                                                                             | $\sigma_{\text{ext}}$ | $\sigma_{\text{int}}$ | $n_{\text{opt}}$ | $\Delta H_f(298.15\text{K})$<br>[kcal/mol] | $S(298.15\text{K})$<br>[cal/mol/K] | $C_p$ [cal/mol/K] |       |       |       |       |        |        |
|-----|-------------------------------------------------------------------------------------|-----------------------|-----------------------|------------------|--------------------------------------------|------------------------------------|-------------------|-------|-------|-------|-------|--------|--------|
|     |                                                                                     |                       |                       |                  |                                            |                                    | 300 K             | 400 K | 500 K | 600 K | 800 K | 1000 K | 1500 K |
| 59  | 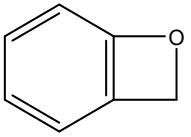   | 1                     | none                  | 1                | 23.3                                       | 76.2                               | 25.1              | 33.3  | 40.6  | 46.6  | 54.9  | 60.6   | 68.8   |
| 60  |    | 1                     | none                  | 1                | -12.9                                      | 81.4                               | 29.3              | 39.2  | 48.1  | 55.6  | 65.9  | 73.2   | 83.6   |
| 61  |    | 1                     | none                  | 1                | -22.1                                      | 86.2                               | 33.8              | 45.4  | 55.8  | 64.6  | 77.0  | 85.8   | 98.5   |
| 62  |   | 1                     | none                  | 1                | 2.8                                        | 78.2                               | 27.2              | 36.5  | 44.4  | 50.9  | 59.7  | 65.7   | 74.2   |
| 63  |  | 1                     | none                  | 1                | 3.8                                        | 85.7                               | 32.3              | 43.0  | 52.4  | 60.1  | 70.9  | 78.4   | 89.2   |

|    |                                                                                     |                                           |      |   |       |      |      |      |      |      |      |      |       |
|----|-------------------------------------------------------------------------------------|-------------------------------------------|------|---|-------|------|------|------|------|------|------|------|-------|
| 64 | 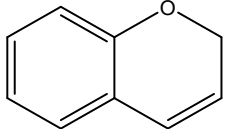   | 1                                         | none | 1 | 4.8   | 84.5 | 32.3 | 43.0 | 52.3 | 60.1 | 70.8 | 78.4 | 89.2  |
| 65 |    | 4                                         | none | 1 | 35.0  | 79.6 | 31.5 | 42.5 | 52.0 | 59.9 | 70.7 | 78.3 | 89.1  |
| 66 |    | 1                                         | 2    | 2 | 9.3   | 86.7 | 30.8 | 40.6 | 49.3 | 56.4 | 66.1 | 73.0 | 83.0  |
| 67 |    | 1                                         | 2    | 2 | 2.6   | 94.2 | 34.2 | 45.7 | 56.2 | 64.9 | 76.9 | 85.5 | 97.8  |
| 68 |    | 1                                         | 2    | 2 | -21.0 | 97.5 | 38.8 | 52.2 | 64.2 | 74.3 | 88.3 | 98.3 | 112.7 |
| 69 |   | 2                                         | none | 1 | 47.7  | 76.5 | 26.9 | 36.2 | 44.6 | 51.6 | 61.3 | 68.2 | 78.1  |
| 70 |  | 2(C <sub>2v</sub> )<br>1(C <sub>s</sub> ) | none | 1 | 14.0  | 80.8 | 30.9 | 41.9 | 52.0 | 60.4 | 72.2 | 80.7 | 93.0  |

|    |                                                                                     |   |      |   |      |      |      |      |      |      |      |      |       |
|----|-------------------------------------------------------------------------------------|---|------|---|------|------|------|------|------|------|------|------|-------|
| 71 | 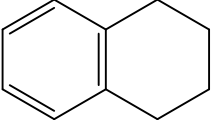   | 2 | none | 1 | 5.2  | 85.9 | 35.4 | 48.1 | 59.6 | 69.4 | 83.3 | 93.2 | 107.8 |
| 72 |    | 2 | none | 1 | 97.8 | 74.9 | 25.7 | 34.1 | 41.3 | 47.2 | 55.2 | 60.8 | 68.8  |
| 73 |    | 1 | none | 1 | 38.2 | 79.9 | 29.4 | 39.6 | 48.5 | 56.0 | 66.1 | 73.3 | 83.6  |
| 74 |    | 1 | none | 1 | 29.7 | 85.3 | 33.8 | 45.6 | 56.1 | 64.8 | 77.1 | 85.8 | 98.5  |
| 75 |   | 2 | none | 1 | 32.8 | 86.7 | 34.0 | 45.6 | 56.0 | 64.7 | 77.0 | 85.8 | 98.5  |
| 76 |  | 1 | 2    | 1 | 55.3 | 89.1 | 30.6 | 39.7 | 47.9 | 54.7 | 63.9 | 70.3 | 79.2  |

|    |                                                                                     |   |      |   |      |      |      |      |      |      |      |      |       |
|----|-------------------------------------------------------------------------------------|---|------|---|------|------|------|------|------|------|------|------|-------|
| 77 | 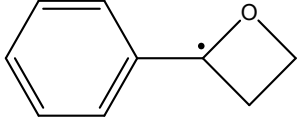   | 1 | 2    | 1 | 33.3 | 92.6 | 34.7 | 45.6 | 55.4 | 63.6 | 74.9 | 82.9 | 94.2  |
| 78 |    | 1 | 2    | 1 | 7.6  | 96.4 | 38.7 | 51.4 | 62.8 | 72.5 | 85.9 | 95.5 | 109.2 |
| 79 |    | 1 | none | 1 | 88.8 | 78.9 | 27.1 | 36.0 | 43.8 | 50.1 | 58.8 | 64.9 | 73.7  |
| 80 |    | 1 | none | 1 | 49.7 | 86.1 | 31.1 | 41.7 | 51.1 | 58.9 | 69.8 | 77.5 | 88.5  |
| 81 |   | 1 | none | 1 | 58.2 | 83.5 | 31.7 | 42.1 | 51.4 | 59.2 | 69.9 | 77.6 | 88.6  |
| 82 |  | 1 | none | 1 | 39.2 | 88.3 | 35.5 | 47.7 | 58.7 | 67.9 | 80.8 | 90.0 | 103.4 |



|    |                                                                                   |   |      |   |      |      |      |      |      |      |      |      |       |
|----|-----------------------------------------------------------------------------------|---|------|---|------|------|------|------|------|------|------|------|-------|
| 83 | 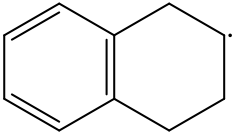 | 1 | none | 1 | 50.5 | 90.7 | 36.3 | 48.3 | 59.1 | 68.2 | 81.0 | 90.2 | 103.5 |
| 84 |  | 1 | none | 1 | 66.1 | 79.2 | 29.0 | 38.9 | 47.3 | 54.2 | 63.5 | 69.9 | 79.1  |
| 85 |  | 1 | none | 1 | 57.7 | 87.3 | 33.7 | 45.1 | 55.0 | 63.2 | 74.6 | 82.6 | 94.1  |
| 86 |  | 1 | none | 1 | 62.3 | 86.6 | 33.8 | 45.2 | 55.1 | 63.2 | 74.6 | 82.6 | 94.1  |

Table S 7 The comparison of GAVs against THERM data. The table provides the GAVs calculated in this work and the deviations from THERM. Relevant aromatic species are also provided.

| Group                                                                                            | $\Delta H_f(298.15\text{K})$ [kcal/mol] | $S(298.15\text{K})$ [cal/mol/K] | Cp [cal/mol/K] |       |       |       |       |        |        |
|--------------------------------------------------------------------------------------------------|-----------------------------------------|---------------------------------|----------------|-------|-------|-------|-------|--------|--------|
|                                                                                                  |                                         |                                 | 300 K          | 400 K | 500 K | 600 K | 800 K | 1000 K | 1500 K |
| 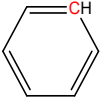<br>CB/H        | 3.36                                    | 11.53                           | 3.27           | 4.42  | 5.46  | 6.33  | 7.51  | 8.35   | 9.58   |
|                                                                                                  | 3.30                                    | 11.53                           | 3.24           | 4.44  | 5.46  | 6.30  | 7.54  | 8.41   | 9.73   |
| <br>C/CB/H3     | -10.15                                  | 30.13                           | 5.86           | 7.57  | 9.35  | 10.96 | 12.86 | 14.48  | 16.85  |
|                                                                                                  | -10.01                                  | 30.29                           | 6.22           | 7.74  | 9.24  | 10.62 | 12.84 | 14.59  | 17.35  |
| <br>C/CB/C/H2   | -5.11                                   | 9.56                            | 5.24           | 6.81  | 8.41  | 9.78  | 11.09 | 12.21  | 13.71  |
|                                                                                                  | -4.86                                   | 9.34                            | 5.84           | 7.61  | 8.98  | 10.01 | 11.49 | 12.54  | 13.76  |
| <br>C/C2/CB/H | -1.70                                   | -11.73                          | 5.04           | 6.60  | 7.94  | 8.93  | 9.56  | 10.07  | 10.63  |
|                                                                                                  | -0.98                                   | -12.15                          | 4.88           | 6.66  | 7.90  | 8.75  | 9.73  | 10.25  | 10.68  |
| <br>CD/CB/H   | 7.27                                    | 6.27                            | 3.20           | 4.77  | 6.21  | 7.39  | 8.31  | 9.03   | 9.95   |

|                                                                                                    |       |        |      |      |      |       |       |       |       |
|----------------------------------------------------------------------------------------------------|-------|--------|------|------|------|-------|-------|-------|-------|
|                                                                                                    | 6.78  | 6.38   | 4.46 | 5.79 | 6.75 | 7.42  | 8.35  | 9.11  | 10.09 |
| 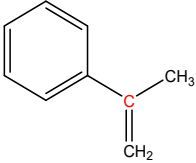<br>CD/C/CB       | 10.07 | -17.33 | 4.28 | 6.02 | 7.41 | 8.44  | 9.13  | 9.65  | 10.19 |
|                                                                                                    | 8.64  | -14.60 | 4.40 | 5.37 | 5.93 | 6.18  | 6.50  | 6.62  | 6.72  |
| <br>CT/CB         | 26.93 | 5.12   | 2.42 | 3.31 | 4.07 | 4.63  | 4.89  | 5.13  | 5.41  |
|                                                                                                    | 24.67 | 6.43   | 2.57 | 3.54 | 3.50 | 4.92  | 5.34  | 5.50  | 5.80  |
| <br>C/CB/CD/H2    | -5.08 | 12.64  | 3.88 | 5.07 | 6.30 | 7.41  | 8.31  | 9.15  | 10.21 |
|                                                                                                    | -4.29 | 2.00   | 4.51 | 6.76 | 8.61 | 10.01 | 11.97 | 13.40 | 15.47 |
| <br>C/C/CB/CD/H | -1.39 | -9.16  | 3.97 | 4.77 | 5.67 | 6.48  | 6.80  | 7.09  | 7.21  |
|                                                                                                    | -1.56 | -11.77 | 4.50 | 6.57 | 8.07 | 8.89  | 9.88  | 10.39 | 10.79 |

|                                                                                                                                         |       |        |      |      |      |      |       |       |       |
|-----------------------------------------------------------------------------------------------------------------------------------------|-------|--------|------|------|------|------|-------|-------|-------|
| 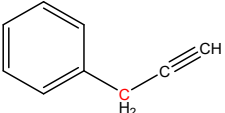<br><chem>C#CCc1ccccc1</chem><br><b>C/CB/CT/H2</b>     | -3.57 | 9.43   | 4.66 | 6.49 | 8.20 | 9.63 | 11.02 | 12.22 | 12.81 |
|                                                                                                                                         | -4.29 | 9.84   | 4.28 | 6.43 | 8.16 | 9.50 | 11.36 | 12.74 | 13.70 |
| <br><chem>C#CCc1ccccc1</chem><br><b>C/C/CB/CT/H</b>    | -0.37 | -12.16 | 5.22 | 6.88 | 8.19 | 9.16 | 9.76  | 10.27 | 9.81  |
|                                                                                                                                         | -1.55 | -11.65 | 4.33 | 6.27 | 7.58 | 8.48 | 9.52  | 10.10 | 10.63 |
| <br><chem>C=CC(=C)c1ccccc1</chem><br><b>C/CB/CD2/H</b> | -0.80 | -2.38  | 4.12 | 4.20 | 4.32 | 4.53 | 4.18  | 4.08  | 3.70  |
|                                                                                                                                         | -1.39 | -11.39 | 4.12 | 6.51 | 8.24 | 9.00 | 10.03 | 10.53 | 10.89 |
| <br><chem>C=CC=Cc1ccccc1</chem><br><b>CD/CB/CD</b>    | 9.41  | -14.09 | 3.86 | 4.63 | 5.36 | 5.99 | 6.17  | 6.43  | 6.61  |
|                                                                                                                                         | 7.18  | -16.50 | 4.70 | 6.13 | 6.87 | 7.10 | 7.20  | 7.16  | 7.06  |
| <br><chem>C=CC=Cc1ccccc1</chem>                      | 8.81  | -14.22 | 2.69 | 3.77 | 5.42 | 5.18 | 5.64  | 6.07  | 6.37  |

|                                                                                               |        |        |      |      |      |      |      |      |      |
|-----------------------------------------------------------------------------------------------|--------|--------|------|------|------|------|------|------|------|
| CD/CB/CT                                                                                      | 6.70   | -17.04 | 2.22 | 3.14 | 4.54 | 4.11 | 5.06 | 5.79 | 6.71 |
| 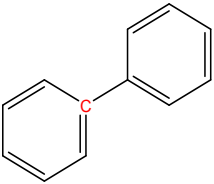<br>CB/CB    | 4.57   | -9.21  | 3.47 | 4.04 | 4.69 | 5.23 | 5.53 | 5.75 | 5.70 |
|                                                                                               | 4.96   | -8.64  | 3.33 | 4.22 | 4.89 | 5.27 | 5.76 | 5.95 | 6.05 |
| <br>O/CB/H   | -37.54 | 29.12  | 4.70 | 4.69 | 4.97 | 5.43 | 5.83 | 6.34 | 6.70 |
|                                                                                               | -37.90 | 29.10  | 4.30 | 4.50 | 4.82 | 5.23 | 6.02 | 6.61 | 7.44 |
| <br>O/CB/O   | 0.58   | 11.04  | 2.60 | 2.22 | 2.33 | 2.62 | 3.03 | 3.39 | 3.26 |
|                                                                                               | -1.98  | 10.70  | 2.85 | 2.92 | 3.02 | 3.09 | 3.48 | 3.66 | 3.23 |
| <br>O/CB/C | -22.73 | 8.19   | 3.13 | 2.80 | 2.88 | 3.21 | 3.29 | 3.54 | 3.30 |
|                                                                                               | -22.60 | 9.70   | 3.40 | 3.70 | 3.70 | 3.80 | 4.40 | 4.60 | □    |

|                                                                                                  |        |        |       |       |       |       |       |       |       |
|--------------------------------------------------------------------------------------------------|--------|--------|-------|-------|-------|-------|-------|-------|-------|
| 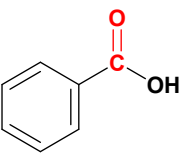<br>CO/CB/O     | -36.39 | 13.72  | 6.92  | 7.61  | 8.45  | 9.43  | 10.50 | 11.22 | □     |
|                                                                                                  | -36.60 | 14.78  | 5.97  | 6.70  | 7.40  | 8.02  | 8.87  | 9.36  | □     |
| <br>C/CB/C/H/O  | -6.45  | -14.47 | 7.29  | 8.80  | 9.76  | 10.27 | 10.16 | 10.15 | 9.35  |
|                                                                                                  | -6.00  | -11.10 | 4.47  | 6.82  | 8.45  | 9.17  | 10.24 | 10.80 | 11.02 |
| <br>C/CB/C2/O   | -5.34  | -36.11 | 5.78  | 7.72  | 8.92  | 9.44  | 8.76  | 8.22  | 6.39  |
|                                                                                                  | -6.60  | -32.56 | 4.63  | 6.79  | 7.95  | 8.40  | 8.80  | 8.44  | □     |
| <br>C/OO/CB/H2 | -6.96  | 7.06   | 4.79  | 5.63  | 7.30  | 8.20  | 9.55  | 10.60 | □     |
|                                                                                                  | -6.41  | 4.68   | 4.31  | 5.66  | 7.64  | 8.62  | 10.38 | 11.40 | □     |
| <br>PH        | 113.47 | 1.09   | -0.50 | -1.08 | -1.67 | -2.19 | -2.94 | -3.53 | -4.48 |
|                                                                                                  | 113.00 | 1.48   | -0.41 | -1.18 | -1.93 | -2.69 | -3.75 | -4.48 | -5.24 |



|                                                                                                        |        |        |      |      |      |       |       |       |       |
|--------------------------------------------------------------------------------------------------------|--------|--------|------|------|------|-------|-------|-------|-------|
| 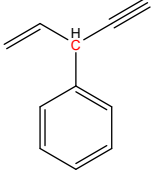 <p>C/CB/CD/CT/H</p>  | 0.46   | -9.05  | 3.35 | 4.67 | 5.74 | 6.56  | 6.76  | 7.07  | 6.23  |
|  <p>C/CB/CT2/H</p>    | 5.40   | -11.37 | 3.48 | 5.54 | 7.16 | 8.38  | 9.22  | 9.95  | 8.75  |
|  <p>O/CB/CD</p>       | -25.73 | 59.61  | 7.36 | 8.36 | 9.97 | 11.84 | 14.40 | 16.62 | 19.54 |
|  <p>O/CB/C<br/>T</p> | -17.92 | 10.00  | 2.43 | 2.19 | 2.36 | 2.26  | 2.84  | 3.32  |       |
|  <p>O/CB/CO</p>     | -36.78 | 7.06   | 2.50 | 2.89 | 3.37 | 3.79  | 3.82  | 3.85  | 3.18  |



|                                                                                                        |        |        |      |      |       |       |       |       |       |
|--------------------------------------------------------------------------------------------------------|--------|--------|------|------|-------|-------|-------|-------|-------|
| 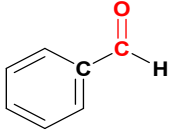 <p>CO/CB/H</p>       | -32.64 | 33.20  | 7.23 | 8.30 | 9.40  | 10.49 | 11.84 | 12.66 |       |
|  <p>CO/CB/C</p>       | -33.35 | 13.02  | 6.68 | 7.49 | 8.28  | 9.24  | 10.00 | 10.35 |       |
|  <p>CO/CB/<br/>CD</p> | -32.18 | 11.20  | 1.83 | 2.42 | 3.02  | 3.62  | 3.94  | 4.03  |       |
|  <p>C/CB/O/H2</p>    | -6.63  | 7.69   | 6.19 | 7.94 | 9.40  | 10.47 | 11.21 | 11.96 | 12.25 |
|  <p>C/CB/CO/</p>    | -6.46  | -19.09 | 6.31 | 9.54 | 11.93 | 13.21 | 13.17 | 12.66 | 24.70 |

| O/H                                                                                                                 |       |        |      |      |      |      |       |       |       |
|---------------------------------------------------------------------------------------------------------------------|-------|--------|------|------|------|------|-------|-------|-------|
| 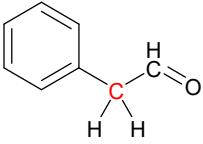 <p>C/CB/CO/<br/>H<sub>2</sub></p> | -4.82 | 9.70   | 5.02 | 6.76 | 8.35 | 9.50 | 10.73 | 11.71 | 27.30 |
|  <p>C/CB/CO/<br/>H/C</p>           | -1.85 | -13.61 | 7.23 | 8.49 | 9.17 | 9.43 | 9.64  | 9.81  | 24.33 |
|  <p>C/CB/CO/<br/>CD/H</p>          | -0.52 | -10.83 | 6.25 | 6.98 | 7.39 | 7.49 | 7.13  | 6.97  | 20.91 |
|  <p>C/CB/CO/C<br/>T/H</p>        | 1.28  | -13.47 | 6.68 | 8.29 | 9.33 | 9.83 | 9.99  | 10.16 | 23.58 |

|                                                                                                            |       |        |       |       |       |       |       |       |       |
|------------------------------------------------------------------------------------------------------------|-------|--------|-------|-------|-------|-------|-------|-------|-------|
| 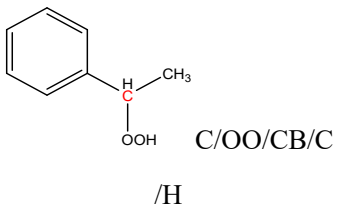 <p>C/OO/CB/C<br/>/H</p>  | -6.76 | -15.70 | 6.09  | 6.59  | 7.84  | 8.28  | 8.72  | 9.00  |       |
|  <p>C/OO/CB/C<br/>2</p>   | -5.51 | -38.46 | 6.73  | 7.64  | 8.69  | 8.64  | 8.10  | 7.54  |       |
|  <p>DSUBE<br/>NZYLS</p>   | 78.81 | -4.29  | 0.23  | 0.65  | 0.78  | 0.67  | -0.04 | -0.80 | -2.44 |
|  <p>DSUBE<br/>NZYLT</p>  | 79.31 | -1.20  | -1.19 | -0.90 | -1.00 | -1.25 | -1.77 | -2.32 | -3.48 |
|  <p>TSUBEN<br/>ZYLT</p> | 73.36 | -6.85  | -0.34 | 0.36  | 0.73  | 0.74  | -0.08 | -0.92 | -2.69 |

|                                                                                                             |       |       |       |       |       |       |       |       |       |
|-------------------------------------------------------------------------------------------------------------|-------|-------|-------|-------|-------|-------|-------|-------|-------|
| 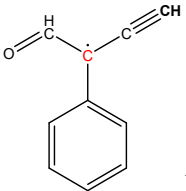 <p>PHCJ(C≡C)<br/>CO</p>   | 75.31 | -1.57 | -2.01 | -1.81 | -1.63 | -1.54 | -1.69 | -2.00 | -2.97 |
|  <p>PHCJ(C)<br/>C≡C</p>    | 78.94 | 0.26  | -0.70 | -1.22 | -1.66 | -2.01 | -2.46 | -2.87 | -3.76 |
|  <p>PHCJ(C=C)C<br/>O</p>   | 78.17 | -1.95 | -1.58 | -1.45 | -1.30 | -1.21 | -1.28 | -1.60 | -2.69 |
|  <p>PHCJ(C≡C)C<br/>≡C</p> | 70.67 | -1.26 | 0.79  | 0.32  | -0.28 | -0.86 | -1.61 | -2.26 | -3.43 |

|                                                                                                            |       |       |       |       |       |       |       |       |       |
|------------------------------------------------------------------------------------------------------------|-------|-------|-------|-------|-------|-------|-------|-------|-------|
| 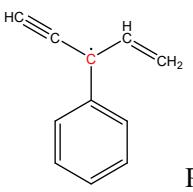 <p>PHCJ(C=C)C<br/>≡C</p> | 72.22 | -2.61 | -0.17 | 0.04  | -0.08 | -0.35 | -1.00 | -1.70 | -3.15 |
|  <p>PHCJO</p>             | 83.62 | -2.20 | 0.48  | 0.41  | 0.11  | -0.30 | -1.20 | -1.92 | -3.16 |
|  <p>PHCJCO</p>            | 83.58 | -4.74 | 0.96  | 0.84  | 0.44  | -0.03 | -0.78 | -1.42 | -2.58 |
|  <p>PHCJ(O)CO</p>        | 72.09 | -1.42 | -1.90 | -3.01 | -3.90 | -4.36 | -3.92 | -3.11 | -1.76 |
|  <p>PHCJ(C)O</p>        | 83.91 | 1.55  | -2.67 | -2.62 | -2.51 | -2.48 | -2.79 | -3.05 | -3.75 |

|                                                                                                                                           |       |       |       |       |       |       |       |       |       |
|-------------------------------------------------------------------------------------------------------------------------------------------|-------|-------|-------|-------|-------|-------|-------|-------|-------|
| 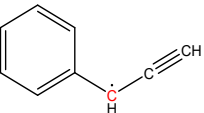<br>$\text{PhC}\overset{\cdot}{\text{C}}\equiv\text{C}$  | 79.93 | -1.79 | 0.50  | 0.30  | -0.16 | -0.67 | -1.46 | -2.14 | -3.33 |
| <br>$\text{PhC}(\overset{\cdot}{\text{C}})\text{C}$<br>O | 82.70 | -0.14 | -2.67 | -2.70 | -2.51 | -3.08 | -2.45 | -2.67 | -3.39 |
